# Supplementary material for: Atomic ruthenium coordinated with chlorine and nitrogen as efficient and multifunctional electrocatalyst for overall water splitting and rechargeable zinc-air battery
Source: Research Square preprint supplement (doi:10.21203/rs.3.rs-870874/v1), 2021-09-08
Supplement: Supplementary file 1 [file cd31a411518d8bfa7843617a.docx]

Supplementary Information

Atomic ruthenium coordinated with chlorine and nitrogen as efficient and multifunctional electrocatalyst for overall water splitting and rechargeable zinc-air battery

**Contents**

[Experimental Section 5](#_Toc81424259)

[1. General material 5](#_Toc81424260)

[2. Instruments and methods 5](#_Toc81424261)

[3. Synthesis of Ru–Cl–N SAC 6](#_Toc81424262)

[4. Electrochemical measurement 7](#_Toc81424263)

[5. Zn-air battery test 8](#_Toc81424264)

[Theoretical Section 10](#_Toc81424265)

[Supplementary Figures and Tables 11](#_Toc81424266)

[**Supplementary Fig. S1**. TGA (black) and DSC (blue) curves of CoRu-ZIF-67 measured under N2 atmosphere with a heating rate of 5 °C/min. 11](#_Toc81424267)

[**Supplementary Fig. S2**. (a) SEM and (b) TEM images of CoRu-ZIF-67, (c) XRD pattern of CoRu-ZIF-67 and the simulated ZIF-67. 12](#_Toc81424268)

[**Supplementary Fig. S3**. (a) SEM, (b) TEM, (c) XRD, (d) HRTEM, (e) SAED of Co NP/Ru–Cl–N SAC. (f) Elemental mapping and line scanning of Co and Ru. 13](#_Toc81424269)

[**Supplementary Fig. S4**. Fitting curve of the FT EXAFS spectrum of Ru–Cl–N SAC in R space. 14](#_Toc81424270)

[**Supplementary Fig. S5**. (a) TEM and (b) XRD of RuN4 SAC. 15](#_Toc81424271)

[**Supplementary Fig. S6**. (a) K-edge XANES spectra and (b) the corresponding Fourier transform of RuN4 SAC, Ru foil and RuO2. (c) Fitting curve of the FT EXAFS spectrum of RuN4 SAC in R space. 16](#_Toc81424272)

[**Supplementary Fig. S7**. (a) TEM and (b) XRD pattern of Ru NP/NC. 17](#_Toc81424273)

[**Supplementary Fig. S8.** (a) K-edge XANES spectra and (b) the corresponding Fourier transform of Ru NP/NC, Ru foil, RuCl3, and RuO2. (c) Fitting curve of the FT EXAFS spectrum of Ru NP/NC in R space. 18](#_Toc81424274)

[**Supplementary Fig. S9.** (a) XPS survey and (b) Co 2p spectrum of Ru–Cl–N SAC. 19](#_Toc81424275)

[**Supplementary Fig. S10.** (a) XPS survey and (b) deconvoluted Co 2p spectrum of Co NP/Ru–Cl–N SAC. 20](#_Toc81424276)

[**Supplementary Fig. S11.** Polarization curve of the SCE reference electrode calibrated against RHE in H2-saturated 1 M KOH electrolyte used for HER and OER measurements. 21](#_Toc81424277)

[**Supplementary Fig. S12.** Polarization curve of the SCE reference electrode calibrated against RHE in H2-saturated 0.1 M KOH electrolyte used for ORR measurements. 22](#_Toc81424278)

[**Supplementary Fig. S13.** a, Copper UPD in 0.5 M H2SO4 in the (I) absence and (II-VI) presence of 5 mM CuSO4 on Ru–Cl–N SAC. For II-VI, the electrode was polarized at 0.22, 0.23, 0.24, 0.25 and 0.26 V for 100 s to form the UPD layers, respectively. **b**, Copper UPD in 0.5 M H2SO4 in the (I, II) absence and (III) presence of 5 mM CuSO4 on Ru–Cl–N SAC. For II and III, the electrode was polarized at 0.26 V for 100 s to form the UPD layer. **c**, Copper UPD in 0.5 M H2SO4 in the (I, II) absence and (III) presence of 5 mM CuSO4 on Pt/C. For II-V, the electrode was polarized at 0.23, 0.24, 0.25 and 0.26 V for 100 s to form the UPD layers, respectively. **d,** Copper UPD in 0.5 M H2SO4 in the (I, II) absence and (III) presence of 5 mM CuSO4 on Pt/C. For II and III, the electrode was polarized at 0.26 V for 100 s to form the UPD layer.. Scan rate: 10 mV s−1. 23](#_Toc81424279)

[**Supplementary Fig. S14.** Comparison of TOF values of the Ru–Cl–N SAC and Pt/C with other recently reported HER catalysts in alkaline condition. 25](#_Toc81424280)

[**Supplementary Fig. S15**. CV curves of (a) Pt/C, (b) RuN4 SAC, (c) Ru–Cl–N SAC and (d) NC scanning at a rate of 2, 4, 6, 8, 10 and 12 mV s-1 in 1 M KOH. 26](#_Toc81424281)

[**Supplementary Fig. S16**. Tafel slop of Ru–Cl–N SAC (red), RuN4 SAC (light blue), NC (dark blue) and IrO2 (purple). 27](#_Toc81424282)

[**Supplementary Fig. S17.** Comparison of TOF values of the Ru–Cl–N SAC with other recently reported OER catalysts in alkaline condition. 28](#_Toc81424283)

[**Supplementary Fig. S18**. Nyquist plots of Ru–Cl–N SAC (red), RuN4 SAC (light blue), NC (dark blue) and IrO2 (purple). 29](#_Toc81424284)

[**Supplementary Fig. S19**. CV curves of (a) IrO2, (b) RuN4 SAC, (c) Ru–Cl–N SAC, (d) NC and (e) the correspoding current density difference (Δj) against scan rate plots scanning at a rate of 2, 4, 6, 8, 10 and 12 mV s-1 in 1 M KOH. 30](#_Toc81424285)

[**Supplementary Fig. S20**. CV curves of Ru–Cl–N SAC measured in the atmosphere of N2 (black) and O2 (red) under a scan rate of 50 mV s-1 in 0.1 M KOH. 31](#_Toc81424286)

[**Supplementary Fig. S21**. Tafel slop of Ru–Cl–N SAC (red), RuN4 SAC (light blue), NC (dark blue) and Pt/C (purple). 32](#_Toc81424287)

[**Supplementary Fig. S22**. Electron transfer number (n) and H2O2 yield of Ru–Cl–N SAC derived from the RRDE measurement. 33](#_Toc81424288)

[**Supplementary Fig. S23**. Polarization curves of Ru–Cl–N SAC (red) and Co NP/Ru–Cl–N SAC (black) in the process of (a) HER, (b) OER and (c) ORR. 34](#_Toc81424289)

[**Supplementary Fig. S24**. The structures of Co (002) 2×2 supercell. 35](#_Toc81424290)

[**Supplementary Fig. S25**. The dissociation process of O2 molecule on Co (002). 36](#_Toc81424291)

[**Supplementary Fig. S26**. The free energy diagrams of OER and ORR on Co (002) at U = 0 V. 37](#_Toc81424292)

[**Supplementary Fig. S27**. The free energy diagrams of HER on Co (002) and RuCl2N2/C at different sites. 38](#_Toc81424293)

[**Supplementary Fig. S28**. (a) HER and (b) OER polarization curves of the original Ru–Cl–N SAC (red), and after addition of EDTA (black) and KSCN (blue). 39](#_Toc81424294)

[**Supplementary Fig. S29**. Charge partitioning of RuN4 SAC obtained by Hirshfeld method. Color code: C gray, N blue, Ru cyan. 40](#_Toc81424295)

[**Supplementary Fig. S30**. Optical image of the overall water splitting electrolyzer cell fabricated by Ru–Cl–N SAC. 41](#_Toc81424296)

[**Supplementary Fig. S31**. Open-circuit voltage (OCV) curves for the Zn-air batteries assembled by Ru–Cl–N SAC (red) and IrO2-Pt/C (black). 42](#_Toc81424297)

[**Supplementary Table S1**. The fitting parameters for the FT EXAFS spectrum of Ru foil, RuO2, RuCl3, Ru–Cl–N SAC, RuN4 SAC and Ru NP/NC in R space. 43](#_Toc81424298)

[**Supplementary Table S2**. Comparison of turnover frequencies (TOFs) with some of recently reported HER catalysts in alkaline condition. 44](#_Toc81424299)

[**Supplementary Table S3**. The HER properties of Ru–Cl–N SAC compared with other recently-reported Ru-based HER electrocatalysts in 1 M KOH. 45](#_Toc81424300)

[**Supplementary Table S4**. Comparison of turnover frequencies (TOFs) with some of recently reported OER catalysts in alkaline condition. 46](#_Toc81424301)

[**Supplementary Table S5**. The OER properties of Ru–Cl–N SAC compared with other recently-reported Ru-based OER electrocatalysts in 1 M KOH. 47](#_Toc81424302)

[**Supplementary Table S6**. The ORR properties of Ru–Cl–N SAC compared with other recently-reported Ru-based ORR electrocatalysts in 0.1 M KOH. 48](#_Toc81424303)

[**Supplementary Table S7**. The HER (1 M KOH), OER (1 M KOH) and ORR (0.1 M KOH) properties of Ru–Cl–N SAC compared with other recently-reported trifunctional electrocatalysts. 49](#_Toc81424304)

[**Supplementary Table S8**. The overall water splitting properties of Ru–Cl–N SAC compared with other recently-reported overall water splitting catalysts measured in 1 M KOH. 51](#_Toc81424305)

[**Supplementary Table S9**. The Zn-air battery properties fabricated by Ru–Cl–N SAC compared with other recently-reported catalysts. 53](#_Toc81424306)

[References 54](#_Toc81424307)

# Experimental Section

## 1. General material

### Cobalt nitrate hexahydrate (Co(NO3)2·6H2O, ≥99%), zinc nitrate hexahydrate (Zn(NO3)2·6H2O, 99%), zinc acetate (Zn(CH3COO)2, ≥99%), methanol (MeOH, CH3OH, 99%), ethanol (EtOH, CH3CH2OH, 99.7%) and isopropanol (IPA, CH3CH(OH)CH3, 98%) were purchased from Sinopharm Chemical Reagent Co., Ltd., zinc foil, gas diffusion layer (GDL, YLS-30T) and hydrophilic carbon paper were purchased from Suzhou Sinero Technology Co., Ltd., ruthenium chloride (RuCl3, ≥99%), ruthenium acetylacetonate ((CH3CO=CHCOCH3)3Ru, 97%), 2-methylimidazole (C4H6N2, ≥98%), iridium oxide (IrO2, 99%), platinum on activated carbon (20wt.% Pt/C), Nafion solution (5%) and potassium hydroxide (KOH, ≥95%) were purchased from Sigma-Aldrich, and deionized (DI) water (resistivity: 18.3 MΩ·cm) were produced by an ultrapure water system (ULUPURE, UPDR-I-10T). All the chemical reagents were used as received without further treatment.

## 2. Instruments and methods

Field-emission scanning electron microscopy (FE-SEM) was carried out on a JEOL S4800 instrument. Transmission electron microscopy (TEM) images and element mapping analysis were exerted on a FEI Tecnai G2 F20 S-TWIN instrument. Aberration-corrected high-angle-annular-dark-field scanning transmission electron microscopy (AC-HAADF-STEM) was performed on Themis Z/ORION70-4M, X-ray synchrotron radiation was acquired on the B14W beamline in Shanghai Synchrotron Radiation Facility. Raman spectrum was recorded on a Renishaw-invia instrument. Powder X-ray diffraction (XRD) were carried out on a Rigaku D/max-2200PC diffractometer (Japan) with Cu Kα radiation (λ = 0.15418 nm). The thermogravimetry analysis-differential scanning calorimetry (TGA-DSC) was performed on a SETARAM LABSYS machine (LABSYS EVO, France) for the weight loss measurement. X-ray photoelectron spectroscopy (XPS) spectra were performed on the Thermo Scientific ESCALab 250Xi using 200 W monochromated Al Kα radiation. Nitrogen adsorption/desorption isotherm curves were recorded on a Quantachrome Autosorb AS-1 instrument at 77 K. HER and OER measurements were conducted on the CHI660E (Chenhua, Shanghai) instrument, and ORR tests were measured using a rotating ring-disk electrode equipped with a Pine WaveDrive20 instrument.

## 3. Synthesis of Ru–Cl–N SAC

9 mmol (2.619 g) of Co(NO3)2·6H2O and 1 mmol (0.207 g) of RuCl3 were dissolved in 30 mL of MeOH under sonication to form solution A, and 40 mmol (3.284 g) of 2-methylimidazole was dissolved in another 30 mL of MeOH to form solution B. Then solution B was added into solution A slowly under sonication for 10 min. The mixture was transfered to a Teflon-lined autoclave capped with a stainless steel vessel. After heating at 160 °C for 6 h, the precipate was seperated by suction filtration, and washed with MeOH several times before drying at 60 °C for 24 h. The as-obtained purple powder precursor was defined as CoRu-ZIF-67. Afterwards, 200 mg of CoRu-ZIF-67 was placed in a crucible and heated at 700 °C for 2 h with a rate of 2 °C/min under Ar atmosphere in a tube furnace. When the temperature decreased to 300 °C with a rate of 10 °C/min, it was cooled to room temperature naturally. The thus-obtained black powder, named as Co NP/Ru–Cl–N SAC, was then dispersed in 1 M of H2SO4 and HF under vigorously stirring for 24 h to remove the Co nanoparticles and unstable Ru sepcies. The final product was obtained by suction filtration, washing with EtOH and water each three times and drying at 60 °C for 24 h, which was defined as Ru–Cl–N SAC. For comparison, several reference samples were synthesized under similar condition. RuN4 SAC was synthesized by using ruthenium acetylacetonate instead of RuCl3 and Ru NP/NC was synthesized by replacing Co(NO3)2·6H2O with Zn(NO3)2·6H2O while keeping other condition unchanged. In the synthesis procedure of Ru NP/NC, NC can be obtained if RuCl3 was absent.

## 4. Electrochemical measurement

### The HER and OER properties were performed on CHI660E electrochemical workstation using a standard three-electrode system with graphtic rod, saturated calomel electrode (SCE) and glass carbon electrode (GCE) as the counter electrode, reference electrode and working electrode, respectively. The working electrode was prepared as follow: firstly, the GCE (φ = 3 mm) was polished by aluminum oxide powder with a size distribution of 1.0, 0.5 and 0.05 μm in sequence. Then 10 mg of the as-synthesized catalyst (5 mg of Pt/C or IrO2) powder was dispersed into the a mixture of 400 μL of IPA and 16 μL of Nafion solution through ultrasonication for 1 h. Afterwards, 4 μL of the catalyst ink was dip-coated onto the surface of GCE dried at room temperature. Before the test, the SCE reference electrode was calibrated against the reversible hydrogen potential (RHE) in H2-saturated 1 M KOH with Pt plate as the working electrode and Pt wire as the counter electrode. Thus, the potentials herein can be obtained by the equation of E(RHE) = E(SCE) + 1.0591. The LSV curve was recorded in a N2-saturated 1 M KOH with a scan rate of 3 mV s-1. Tafel slope was obtained by plotting the LSV curve using the equation of η = a + b log j, where η refers to the overpotential, b is the Tafel slope and a denotes the intercept2. The electrochemical impedance spectroscopy (EIS) were performed under open circuit potentials for all materials and the frequency range from 0.1 Hz to 100 kHz with an amplitude of 5 mV were used to carry out the experiment. The impedance data were represented by the Nyquist curve.For the double-layer capacitor (Cdl) data, CV curves were recorded in the non-Faradic region with scanning rate of 2, 4, 6, 8, 10 and 12 mV s-1, and the Cdl can be obtained by plotting the current difference (Δj) against the scanning rate.

### The overall water splitting was conducted on a two-electrode setup with a scan rate of 3 mV s-1 under 1 M KOH. The catalyst ink was coated on the hydrophilic carbon paper with an area of 1 × 2 cm2 and dried at room temperature. For comparison, a water electrolyzer cell of IrO2ǁPt/C was also fabricated using 5 mg of IrO2 and 5 mg of 20% Pt/C as the cathode and anode, respectively.

### The ORR measurement was carried out on a rotating ring-disk electrode (RRDE) (φ = 4 mm) equipped with a Pine WaveDrive20 instrument using Pt wire and SCE as the counter electrode and reference electrode, respectively. 6 μL of the catalyst ink was dipped onto the disk surface and dried naturally. To be accurate, the SCE was also calibrated against RHE in H2-saturated 0.1 M KOH with RRDE as the working electrode and Pt wire as the counter electrode. Thus, the potentials herein can be obtained by the equation of E(RHE) = E(SCE) + 1.00371. CV curves were recorded in N2- and O2-saturated 0.1 M KOH solution with a scan rate of 50 mV s-1. LSV curves were performed under O2-saturated 0.1 M KOH solution with a scan rate of 1600 rpm. The hydrogen peroxide yield (*H2O2*%) and the electron transfer number (*n*) were calculated from the current of both disk and ring electrodes using the following equation:3

### (1)

### (2)

### where is the ring current, is the disk current, and the current collection efficiency (*N*) the of Pt ring is determined to be 0.38 in our system.

### The anti-poisoning the catalyst was evaluated by adding 1 M of MeOH into the electrolyte during the current-time chronoamperometry test. For the investigation of the active site of the Ru–Cl–N SAC catalyst, 10 mM of KSCN and EDTA was separately added into the electrolyte under stirring for LSV measurements4.

## 5. Zn-air battery test

### For the fabrication of the liquid rechargeable Zn-air battery, 18 mg of catalyst and 2 mg of conductive carbon black were firstly dispersed into a mixture of 960 μL of IPA and 40 μL of Nafion solution under ultrasonication for 1 h. Then, 50 μL of the catalyst ink was dip-coated onto the surface of GDL (1 cm2) as the cathodic air electrode and a piece of Zn plate (4.5 cm2) was used as anodic electrode. The cell was conducted in 6 M KOH with 0.2 M zinc acetate5. The discharge polarization curve was measured in the voltage range of 1.55 to 0.2 V with a scan rate of 5 mV s-1, and the specific capacity was tested under a current density of 20 mA cm-2. The charge-discharge cycling stability was acquired under 2 mA cm-2 with charge-discharge interval of 10 min. For comparison, another reference cell assembly by a mixture catalyst of 5 mg IrO2 and 5 mg 20% Pt/C as the air electrode in the similar preparation procedure.

# Theoretical Section

### All the spin-unrestricted density functional theory (DFT) calculations were carried out using the Dmol3 module in the Materials studio6. The exchange-correlation of the electron was performed by the generalized gradient approximation (GGA)7 method with Perdew–Burke–Ernzerhof (PBE)8. The van der Waals force is treated with long-range dispersion correction through Tkatchenko and Scheffler’s scheme9. During geometric structural optimizations, the convergence criteria were set to 10-5 Ha for the energy, 0.002 Ha/Å for the force, and 0.005 Å for the displacement. The smearing value was set to 0.005 Ha to achieve self-consistent field convergence.

### The change in Gibbs free energy (ΔG) for each reaction step is given by the equation

### ΔG=ΔE+ΔEZPE-TΔS+ΔGU (3)

### where ΔE is the reaction energy gained from the DFT calculations, ΔEZPE is the change of zero-point energy, T is the temperature (298.15 K) and ΔS is the change of entropy. ΔGU = -neU, in which n is the number of transferred electrons and U is the applied potential.

### The overpotential (ղ) can be calculated by the following equations:

### ղ (OER)= ΔGmax/e -1.23 (4)

### ղ (ORR) = ΔGmax/e +1.23 (5)

# Supplementary Figures and Tables


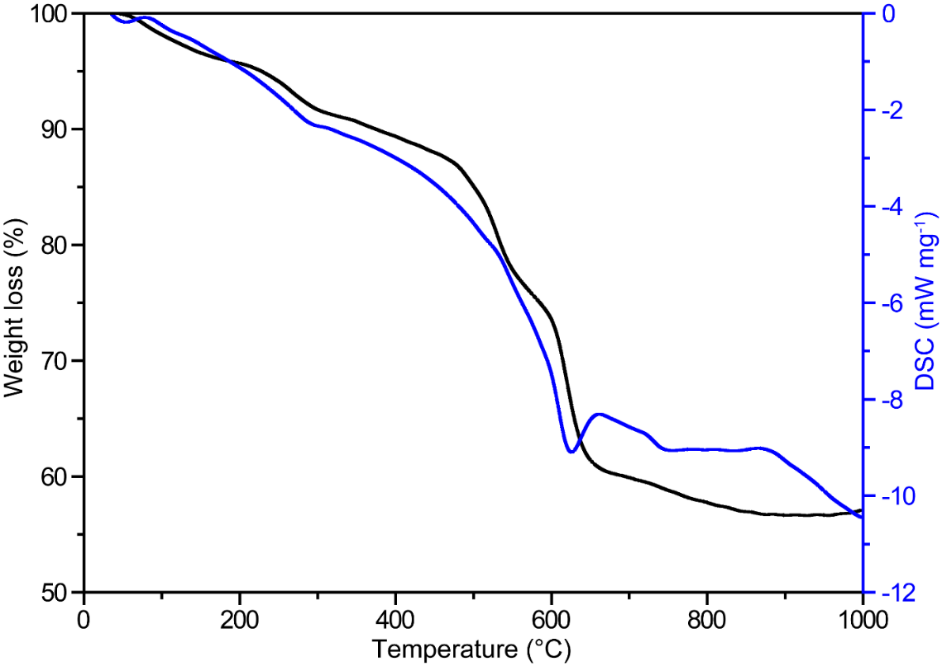


**Supplementary Fig. S1**. TGA (black) and DSC (blue) curves of CoRu-ZIF-67 measured under N2 atmosphere with a heating rate of 5 °C/min.


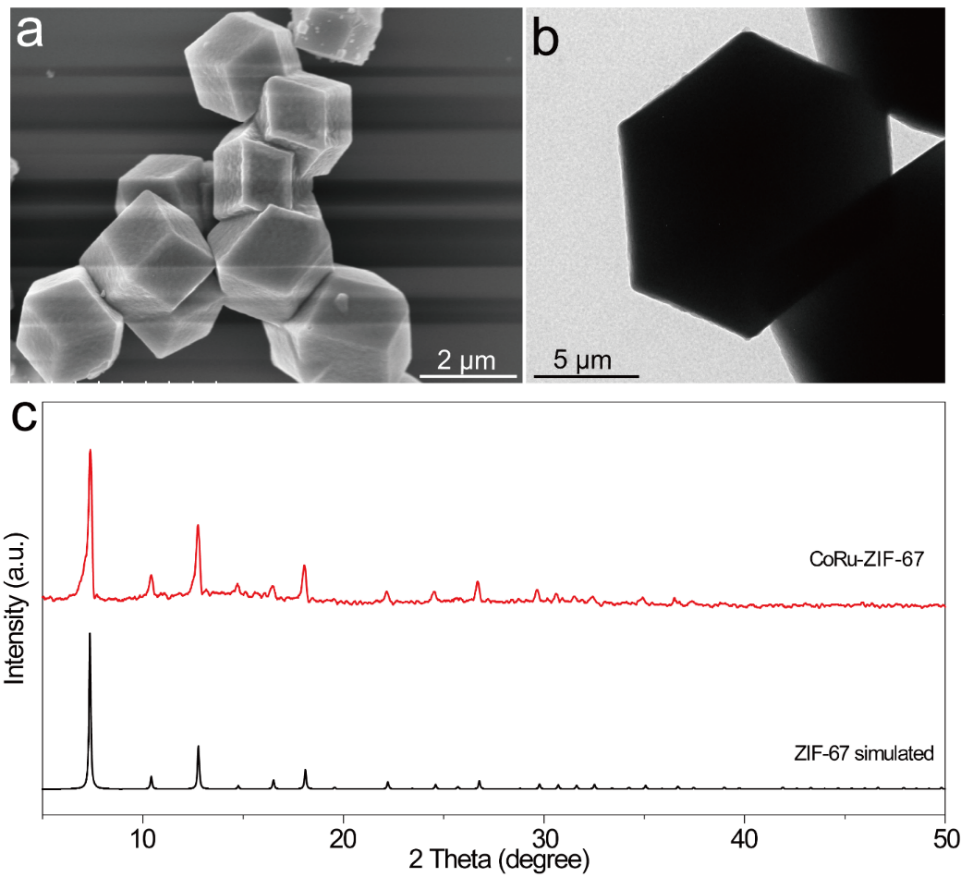


**Supplementary Fig. S2**. (a) SEM and (b) TEM images of CoRu-ZIF-67, (c) XRD pattern of CoRu-ZIF-67 and the simulated ZIF-67.


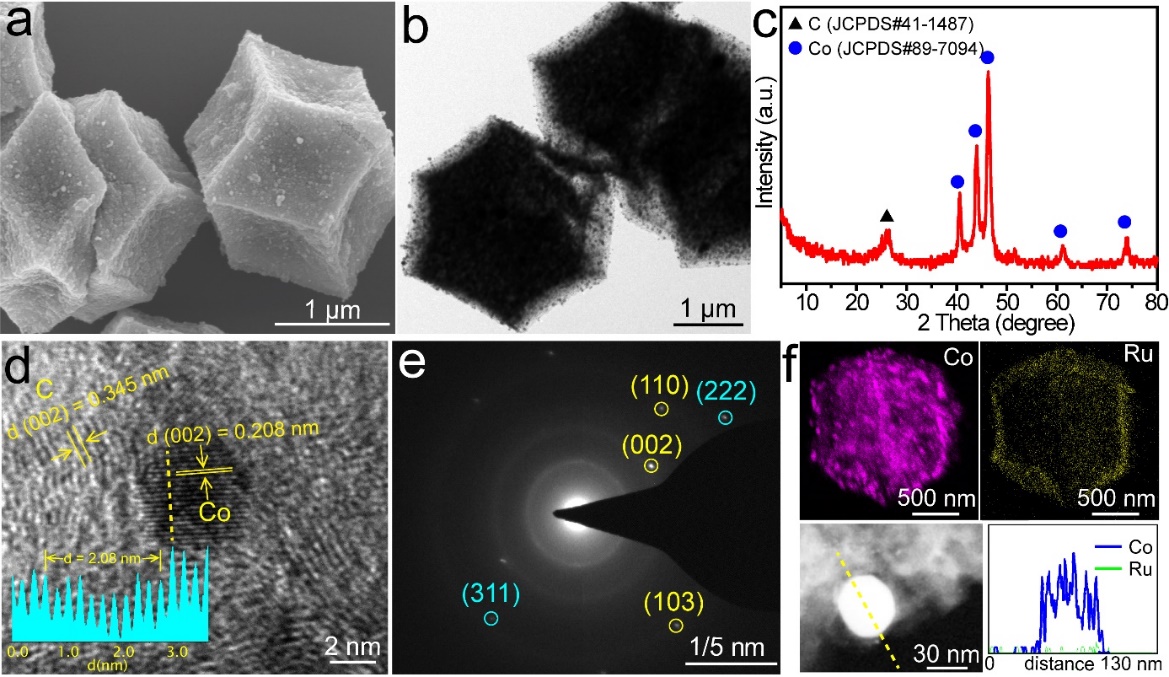


**Supplementary Fig. S3**. (a) SEM, (b) TEM, (c) XRD, (d) HRTEM, (e) SAED of Co NP/Ru–Cl–N SAC. (f) Elemental mapping and line scanning of Co and Ru.

From the SEM and TEM images in Supplementary Fig. S3a,b, it can be seen that the morphoogy of Co NP/Ru–Cl–N SAC remained as the CoRu-ZIF-67, but the surface become relative rough with numerous ultrasmall nanoparticle. XRD pattern and HRTEM image of Co NP/Ru–Cl–N SAC (Supplementary Fig. S3c,d) indicated that Co nanoparticles were in the form of hexagonal crystalline phase (JCPDS 89-7094) imbedded onto the carbon matrix. The SAED result further conformed the coexistence of Co nanoparticles and graphitic carbon. While the Ru was in the form of amorphous state. EDS mapping and line scanning demonstrated that Ru was uniformly dispersed on the carbon substrate and Co was nanoparticle.


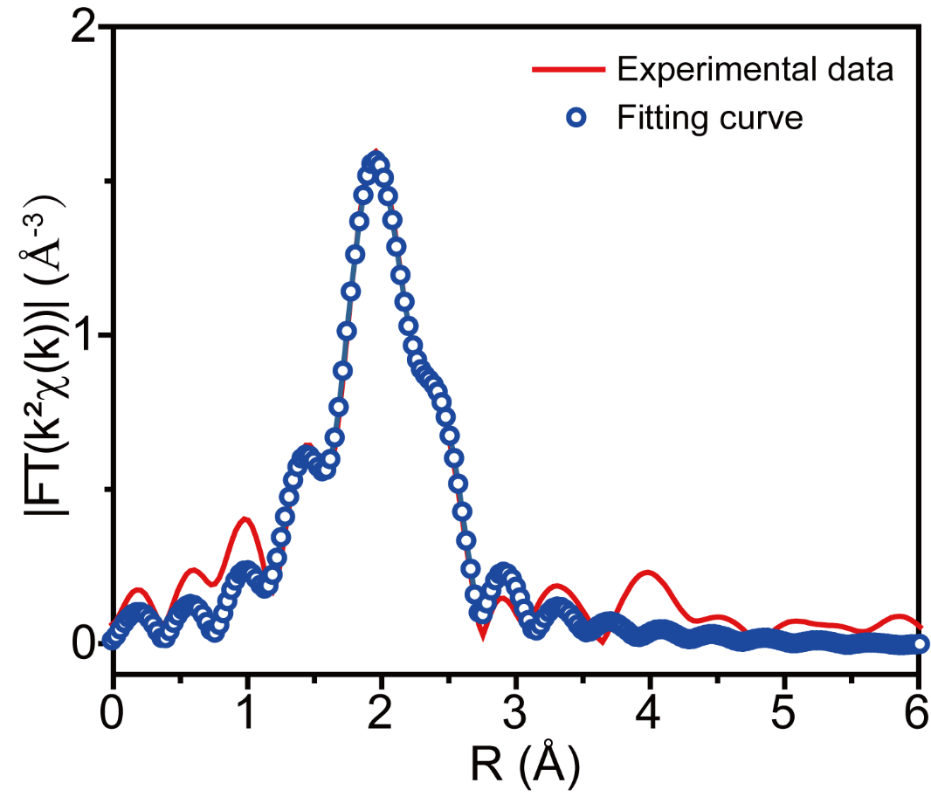


**Supplementary Fig. S4**. Fitting curve of the FT EXAFS spectrum of Ru–Cl–N SAC in R space.


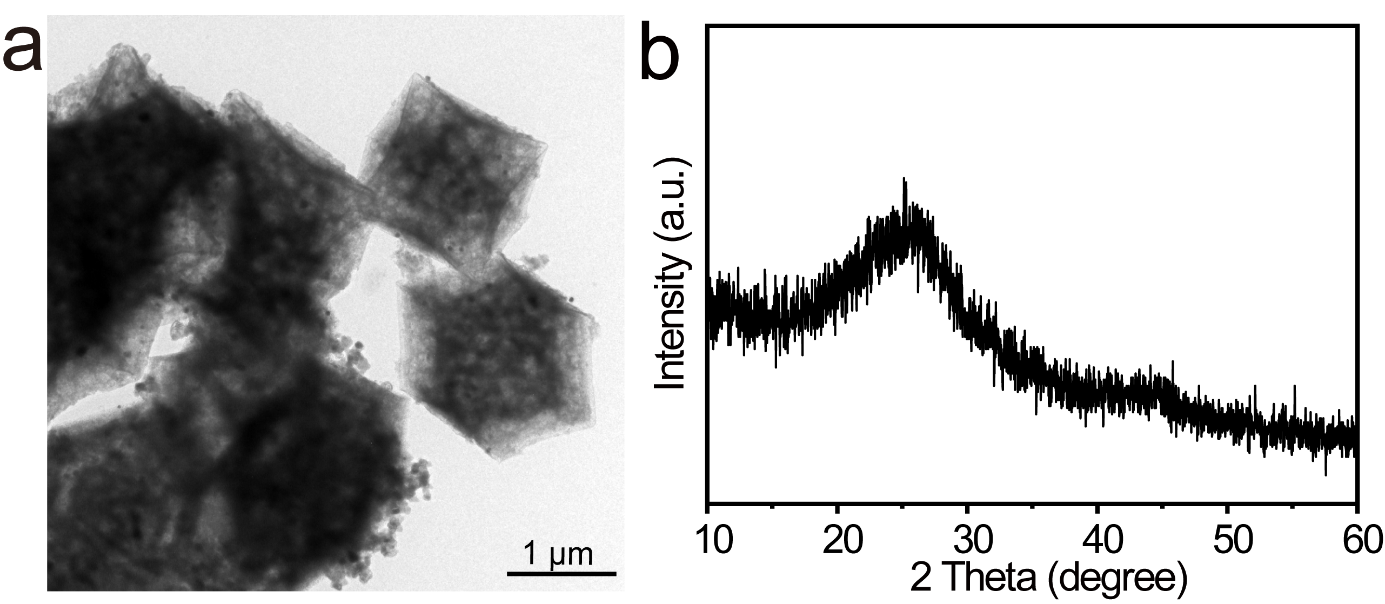


**Supplementary Fig. S5**. (a) TEM and (b) XRD of RuN4 SAC.


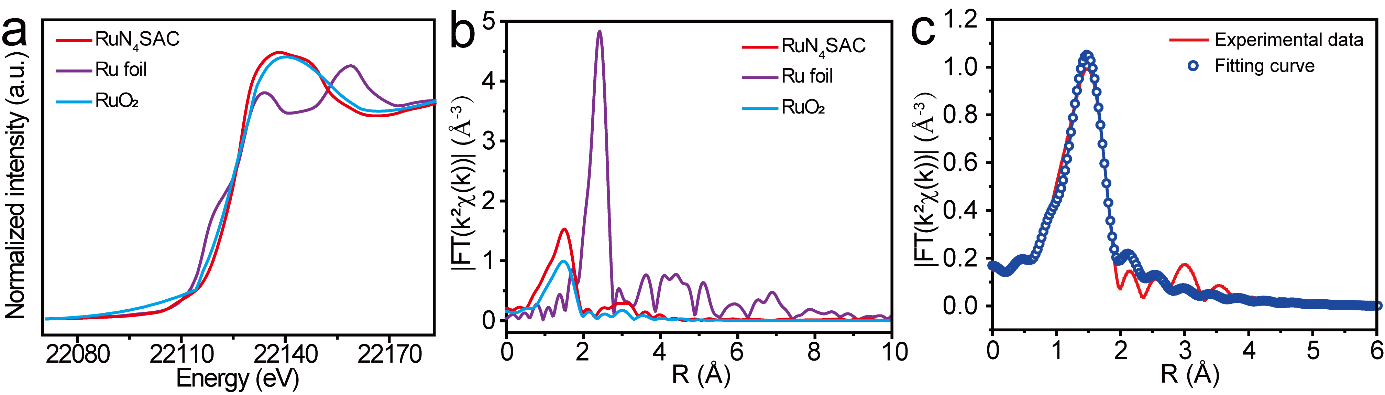


**Supplementary Fig. S6**. (a) K-edge XANES spectra and (b) the corresponding Fourier transform of RuN4 SAC, Ru foil and RuO2. (c) Fitting curve of the FT EXAFS spectrum of RuN4 SAC in R space.

**Supplementary Fig. S6a** shows the Ru K-edge X-ray adsorption near-edge structure (XANES) spectrum of RuN4 SAC, Ru foil and RuO2. The adsorption location of RuN4 SAC was slightly higher than that of Ru foil and lower than that of RuO2, indicative of a chemical state between 0 and +4. Fourier-transform (FT) *k*2-weighted EXAFS spectrum of Ru K edge was shown in **Supplementary Fig. S6b**. The dominant coordination peak located at 1.49 Å for RuN4 SAC was assigned to Ru-O/N bond of the atomic Ru coordinated with O/N10, which was almost overlapped with the peak of RuO2. No any peak belonging to Ru nanoparticles in RuN4 SAC was observed in reference to Ru foil. Fitting the FT EXAFS spectrum of RuN4 SAC in R space revealed an average coordination number (CN) of 4.9 ± 0.6 for Ru-N (**Supplementary Fig.S6c** and **Table S1**), leading to a chemical formula of RuN4.


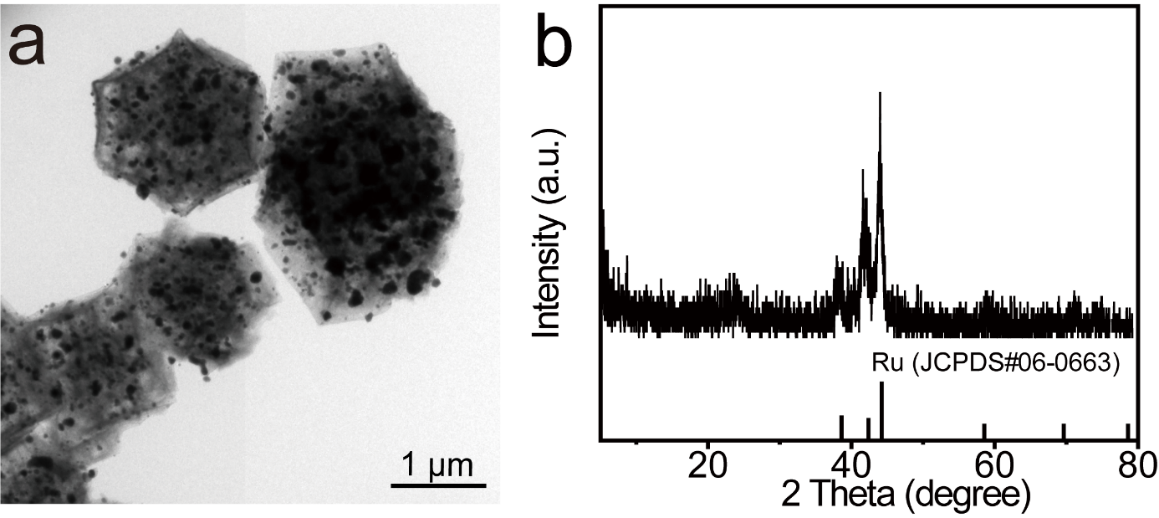


**Supplementary Fig. S7**. (a) TEM and (b) XRD pattern of Ru NP/NC.


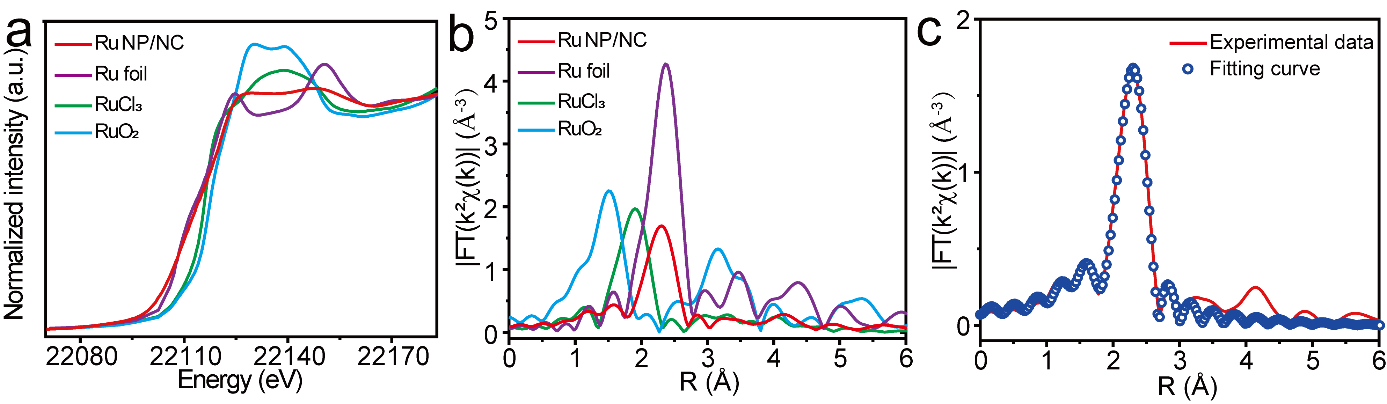


**Supplementary Fig. S8.** (a) K-edge XANES spectra and (b) the corresponding Fourier transform of Ru NP/NC, Ru foil, RuCl3, and RuO2. (c) Fitting curve of the FT EXAFS spectrum of Ru NP/NC in R space.

**Supplementary Fig. S8a** shows the Ru K-edge XANES spectrum of Ru NP/NC, Ru foil, RuCl3, and RuO2. The adsorption location of Ru NP/NC was slightly higher than that of Ru foil and lower than that of RuCl3, indicative of a chemical state between 0 and +3. FT-EXAFS spectrum of Ru K edge was shown in **Supplementary Fig. S8b**. The only one dominant coordination peak located at 2.30 Å for Ru NP/NC was assigned to Ru-Ru bond of the Ru nanoparticle4, which was almost overlapped with the peak of Ru foil. Fitting the FT EXAFS spectrum of Ru NP/NC in R space revealed an average coordination number (CN) of 12 ± 0.3 for Ru-Ru with a bond length of 2.66 Å (**Supplementary Fig.S6c** and **Table S1**).


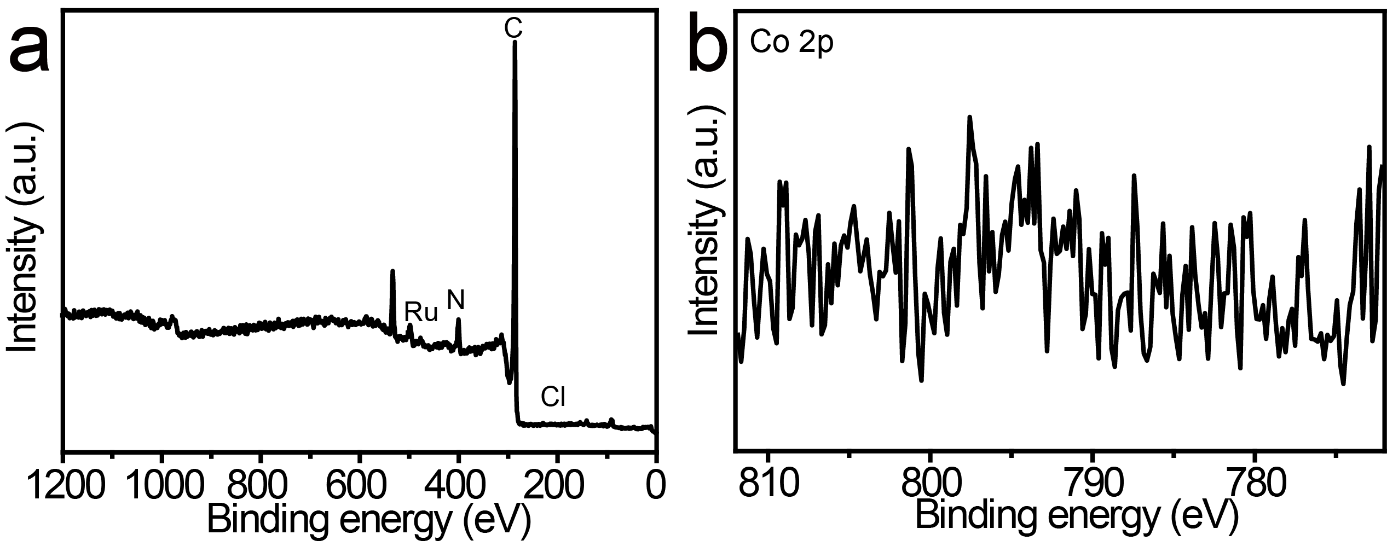


**Supplementary Fig. S9.** (a) XPS survey and (b) Co 2p spectrum of Ru–Cl–N SAC.


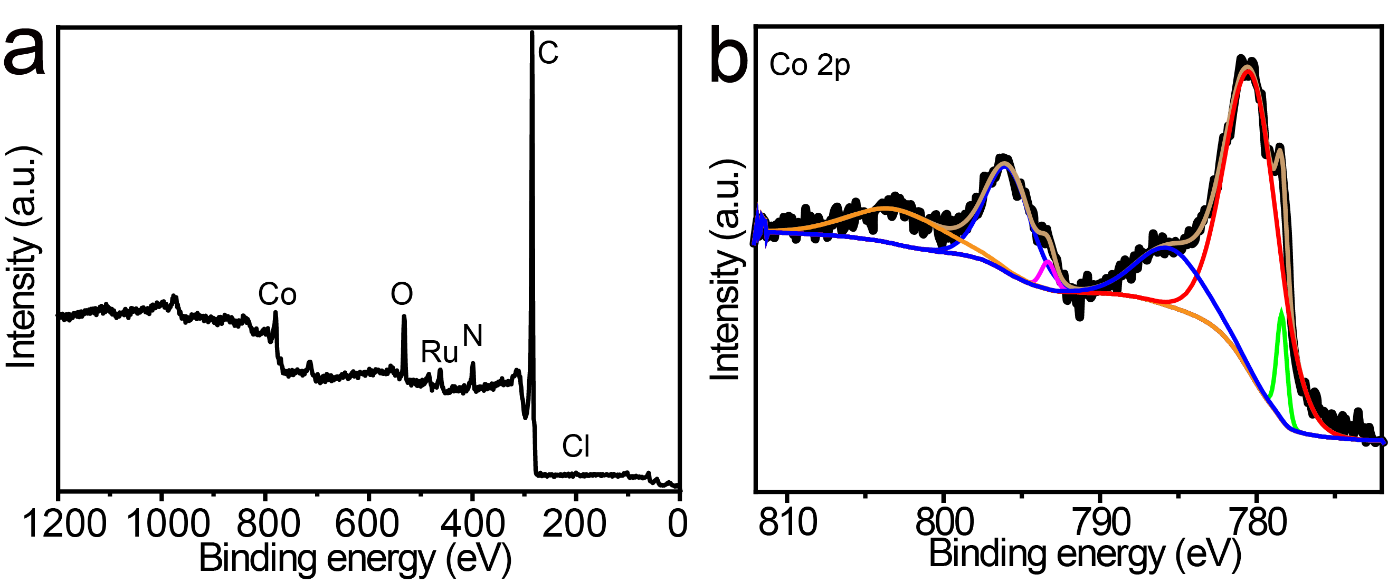


**Supplementary Fig. S10.** (a) XPS survey and (b) deconvoluted Co 2p spectrum of Co NP/Ru–Cl–N SAC.

The XPS survey of Co NP/Ru–Cl–N SAC disclosed that the sample included Co, Ru, C, N, O and Cl element (**Supplementary Fig. S10a**). From the high-resolution XPS of Co 2p spectrum (**Supplementary Fig. S10b**), it can be seen that the binding energy of Co 2p3/2 located at 778.34, 780.57 and 785.60 eV and Co 2p1/2 located at 793.24, 796.13 and 803.48 eV, corresponding to the Co3+, Co2+ and satellite11, respectively. This result evidently demonstrated the existence of Co in the sample of Co NP/Ru–Cl–N SAC before acid washing.


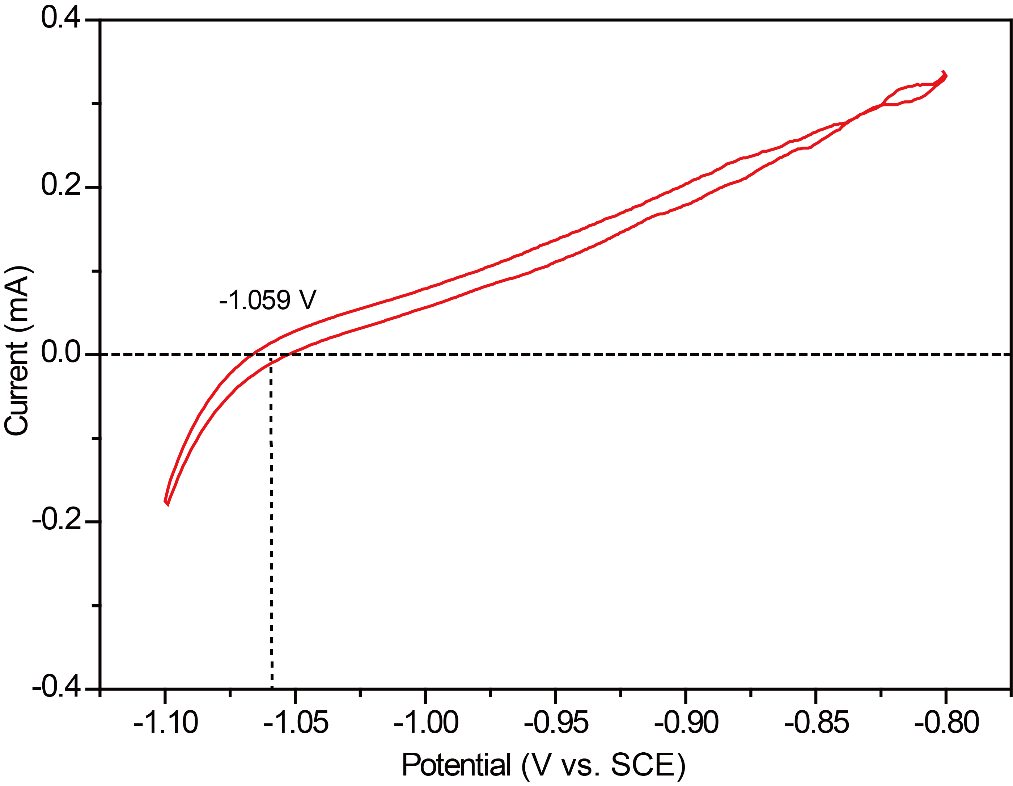


**Supplementary Fig. S11.** Polarization curve of the SCE reference electrode calibrated against RHE in H2-saturated 1 M KOH electrolyte used for HER and OER measurements.


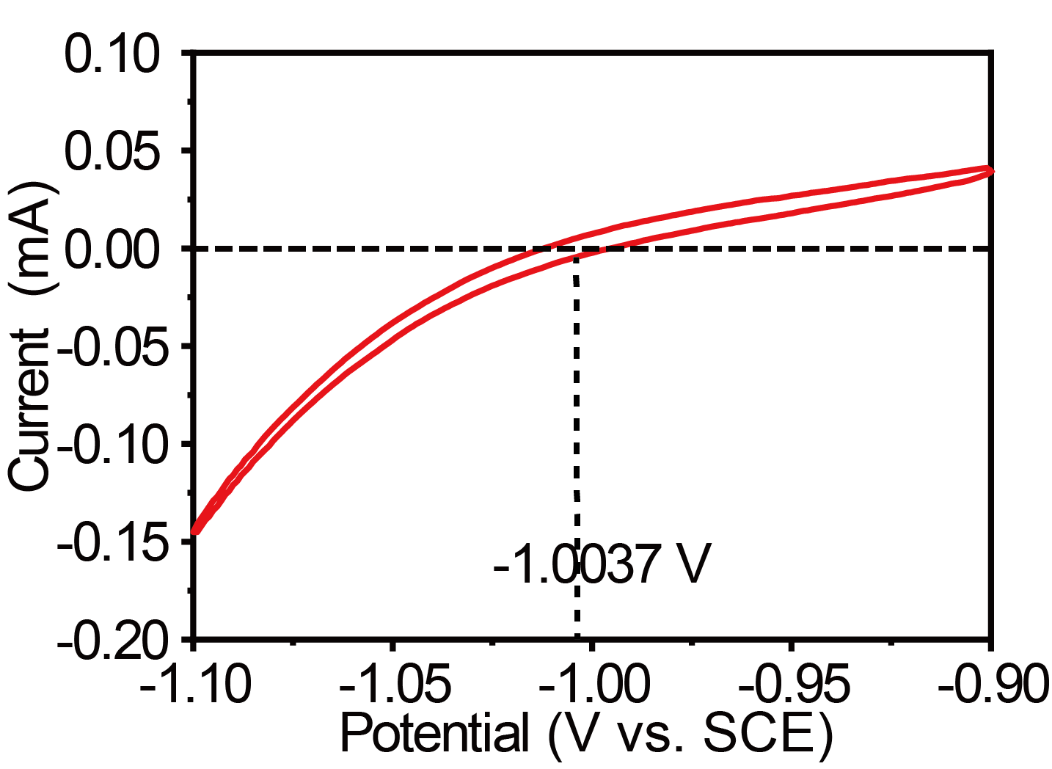


**Supplementary Fig. S12.** Polarization curve of the SCE reference electrode calibrated against RHE in H2-saturated 0.1 M KOH electrolyte used for ORR measurements.


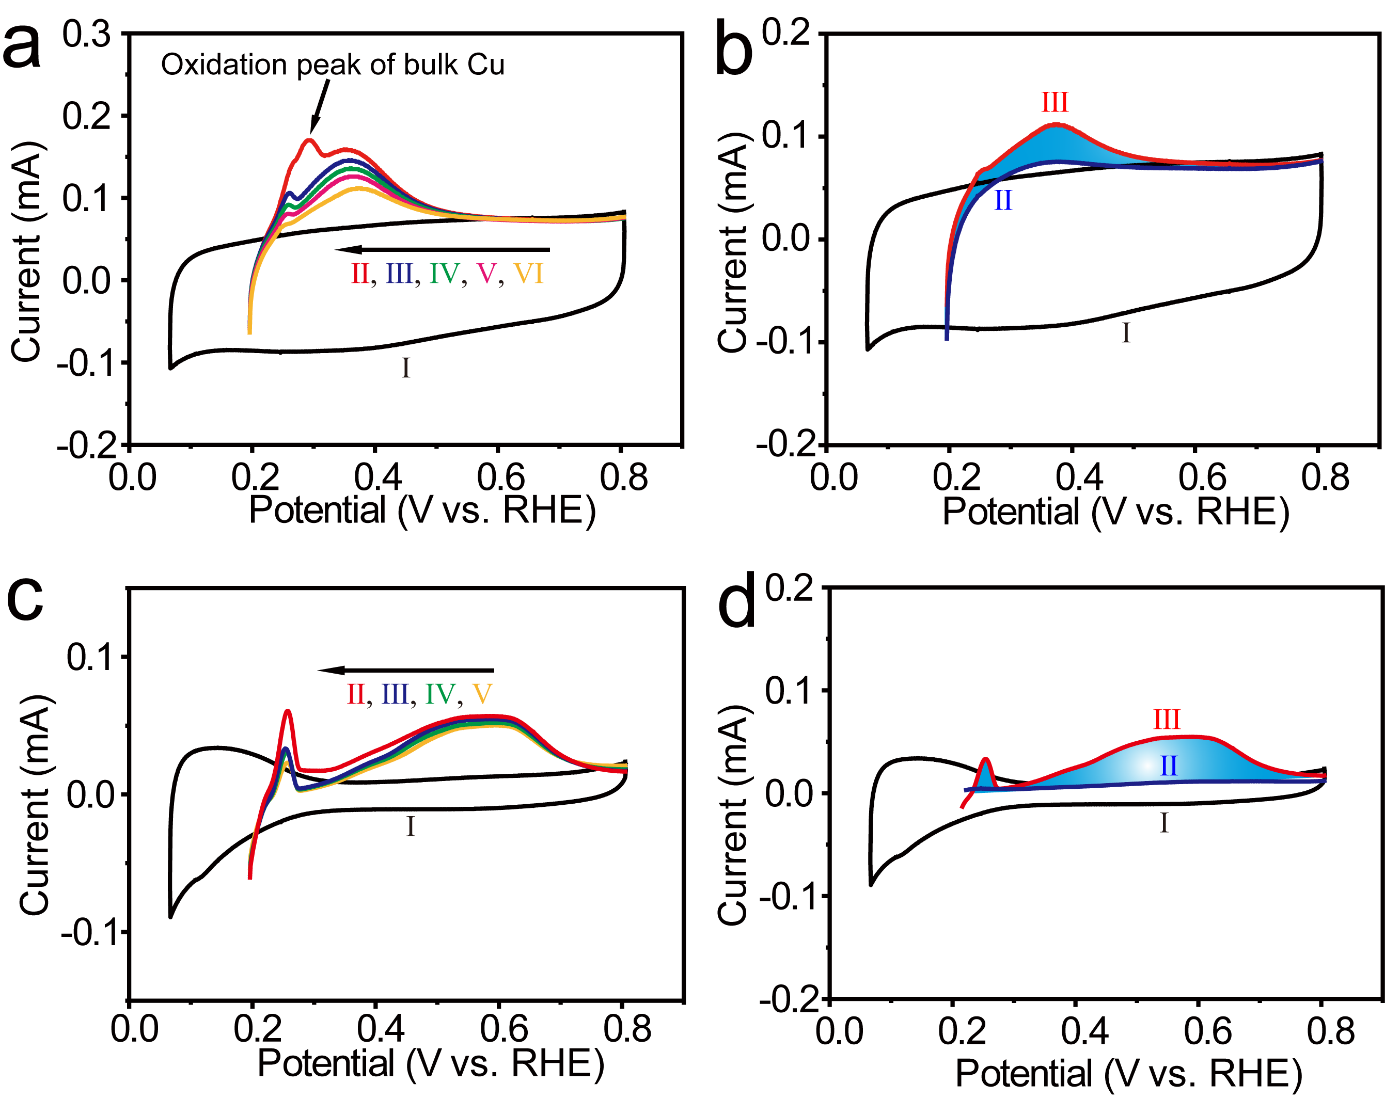


**Supplementary Fig. S13.** a, Copper UPD in 0.5 M H2SO4 in the (I) absence and (II-VI) presence of 5 mM CuSO4 on Ru–Cl–N SAC. For II-VI, the electrode was polarized at 0.22, 0.23, 0.24, 0.25 and 0.26 V for 100 s to form the UPD layers, respectively. **b**, Copper UPD in 0.5 M H2SO4 in the (I, II) absence and (III) presence of 5 mM CuSO4 on Ru–Cl–N SAC. For II and III, the electrode was polarized at 0.26 V for 100 s to form the UPD layer. **c**, Copper UPD in 0.5 M H2SO4 in the (I, II) absence and (III) presence of 5 mM CuSO4 on Pt/C. For II-V, the electrode was polarized at 0.23, 0.24, 0.25 and 0.26 V for 100 s to form the UPD layers, respectively. **d,** Copper UPD in 0.5 M H2SO4 in the (I, II) absence and (III) presence of 5 mM CuSO4 on Pt/C. For II and III, the electrode was polarized at 0.26 V for 100 s to form the UPD layer.. Scan rate: 10 mV s−1.

**Active site measurement:**

The active site was assessed by the underpotential deposition of copper (Cu-UPD) method, which has been widely used for determine the corresponding active sites12,13. In this manner, the number of active site (n) can be obtained by the UPD copper stripping charge (QCu, CuUPD → Cu2+ + 2e-) with the following equation:

n = QCu/2F

where F is the Faraday constant (96485 C mol-1).

**Calculation of the turnover frequency (TOF):**

The TOF (s-1) can be estimated by the following equation:

TOF = I/(2nF) for HER and TOF = I/(4nF) for OER

Where I is the current (A) during the linear scaning process, F is the Faraday constant (96485 C mol-1), n is the number of active sits (mol). The factor 1/2 (1/4) are based on the consideration that two (four) electrons transfered to form one hydrogen (oxygen) molecule in the HER (OER) process.


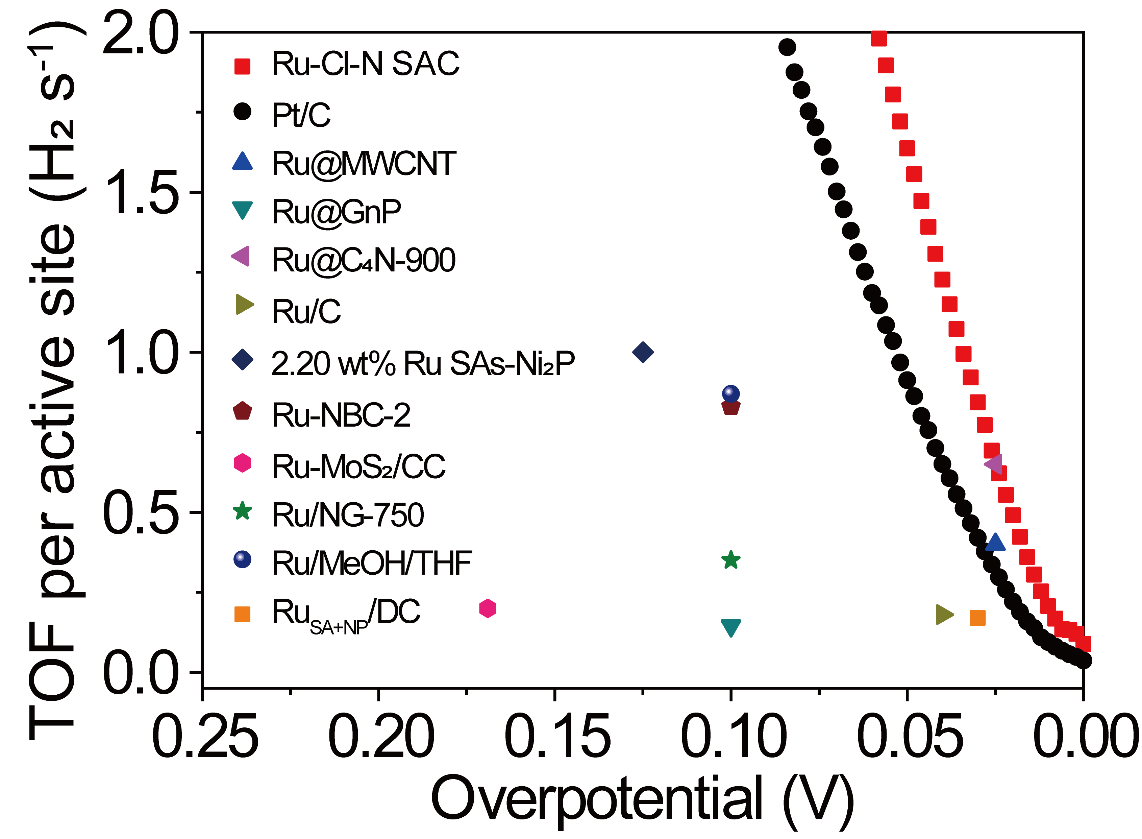


**Supplementary Fig. S14.** Comparison of TOF values of the Ru–Cl–N SAC and Pt/C with other recently reported HER catalysts in alkaline condition.


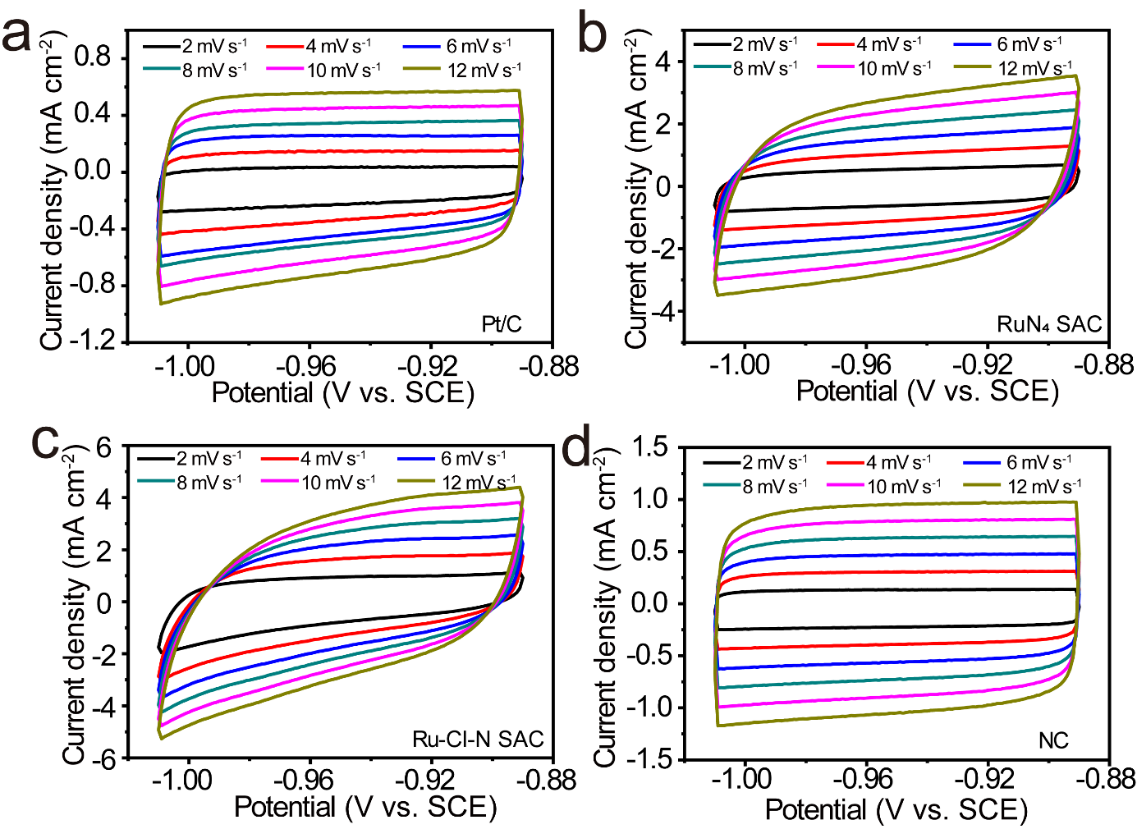


**Supplementary Fig. S15**. CV curves of (a) Pt/C, (b) RuN4 SAC, (c) Ru–Cl–N SAC and (d) NC scanning at a rate of 2, 4, 6, 8, 10 and 12 mV s-1 in 1 M KOH.


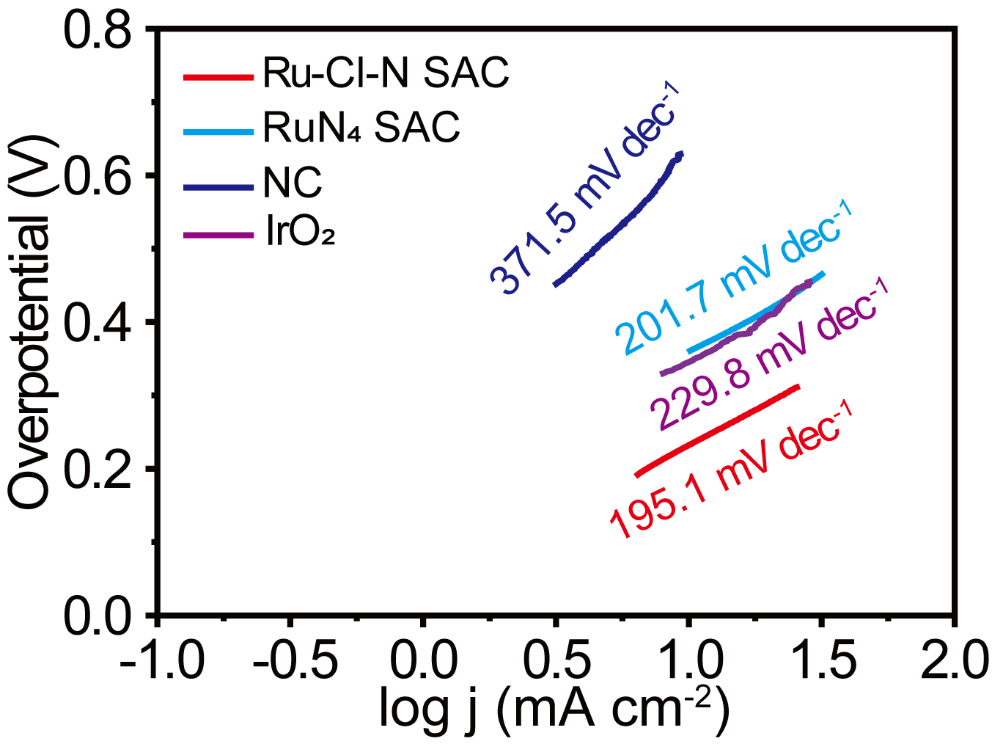


**Supplementary Fig. S16**. Tafel slop of Ru–Cl–N SAC (red), RuN4 SAC (light blue), NC (dark blue) and IrO2 (purple).


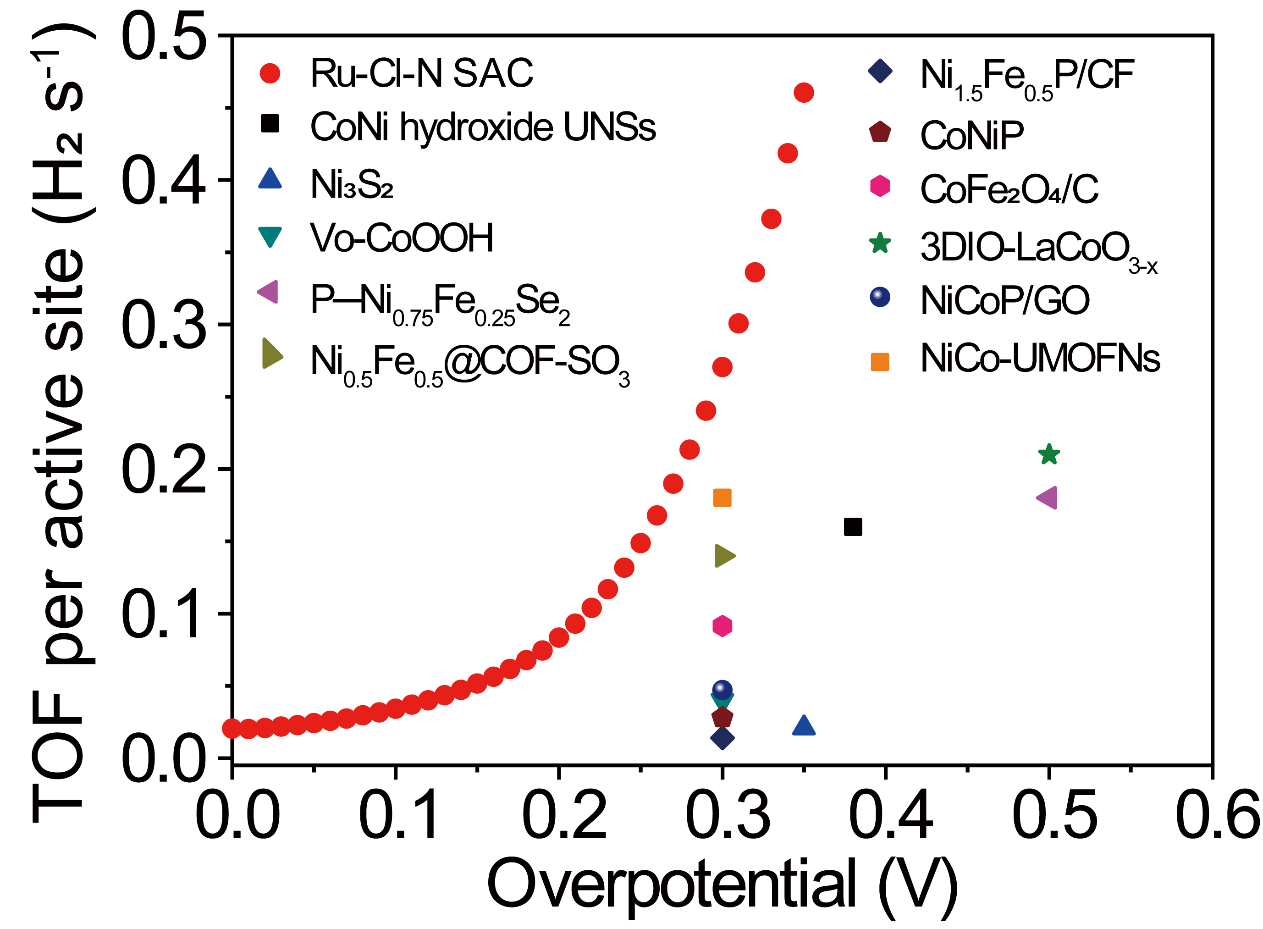


**Supplementary Fig. S17.** Comparison of TOF values of the Ru–Cl–N SAC with other recently reported OER catalysts in alkaline condition.


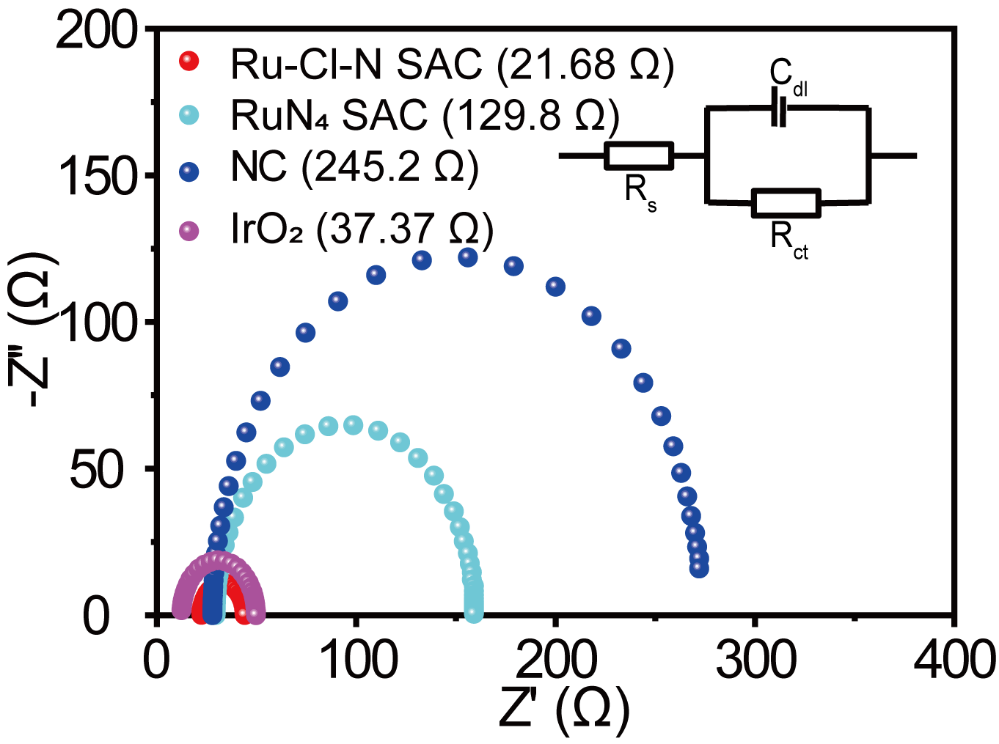


**Supplementary Fig. S18**. Nyquist plots of Ru–Cl–N SAC (red), RuN4 SAC (light blue), NC (dark blue) and IrO2 (purple).


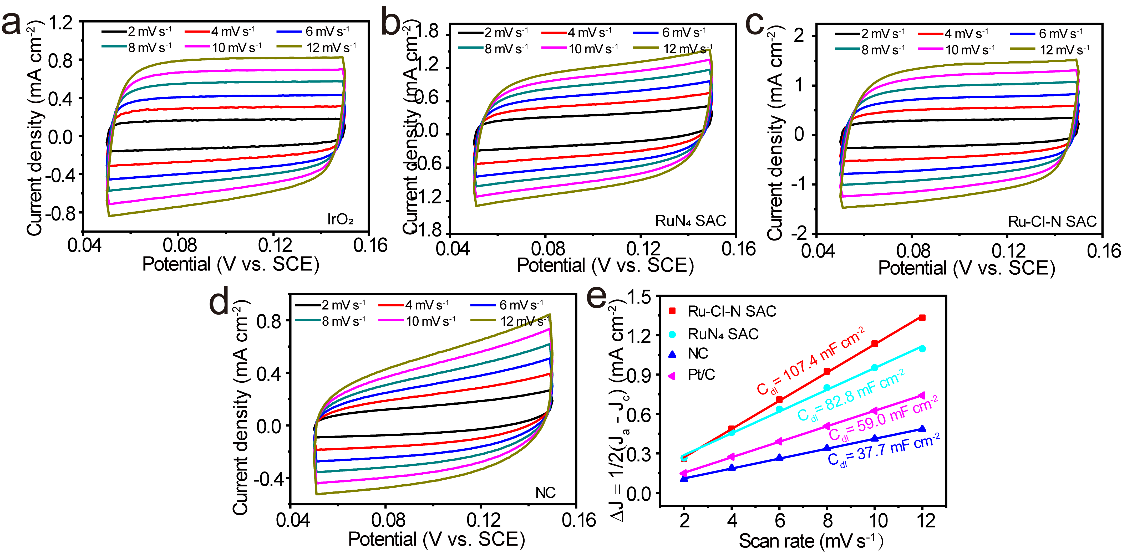


**Supplementary Fig. S19**. CV curves of (a) IrO2, (b) RuN4 SAC, (c) Ru–Cl–N SAC, (d) NC and (e) the correspoding current density difference (Δj) against scan rate plots scanning at a rate of 2, 4, 6, 8, 10 and 12 mV s-1 in 1 M KOH.


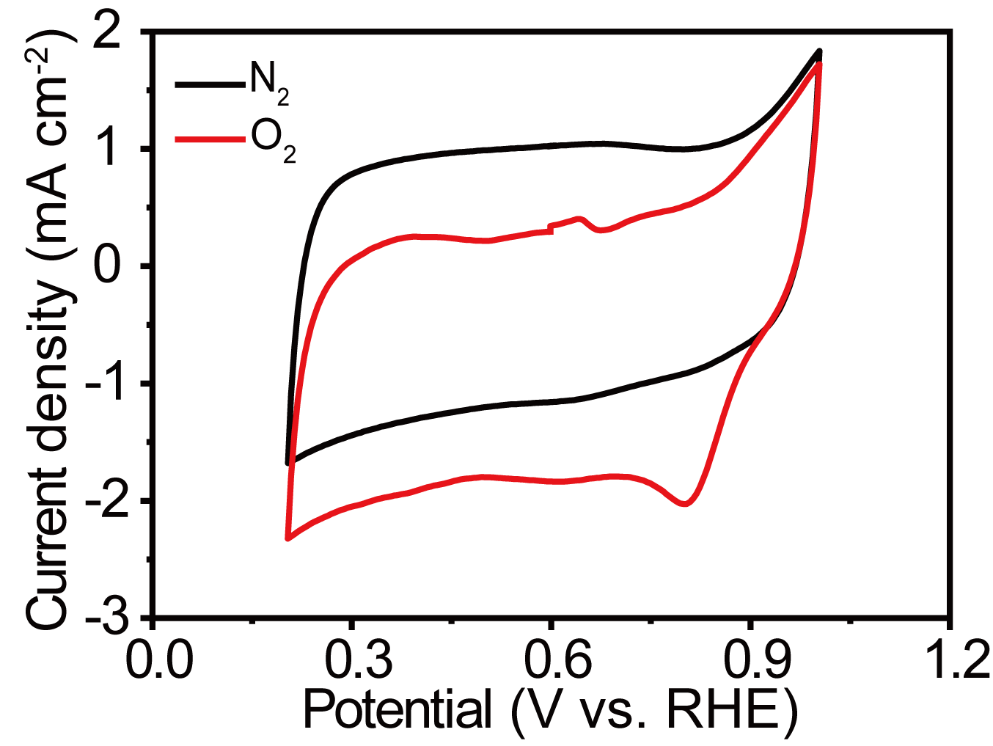


**Supplementary Fig. S20**. CV curves of Ru–Cl–N SAC measured in the atmosphere of N2 (black) and O2 (red) under a scan rate of 50 mV s-1 in 0.1 M KOH.


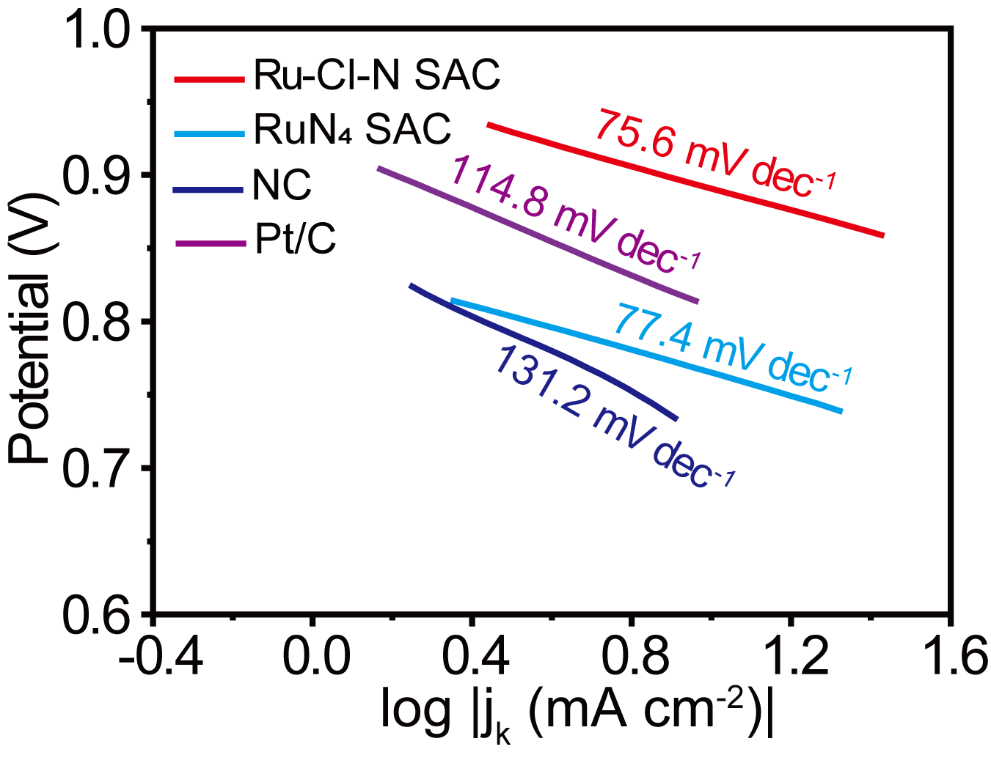


**Supplementary Fig. S21**. Tafel slop of Ru–Cl–N SAC (red), RuN4 SAC (light blue), NC (dark blue) and Pt/C (purple).


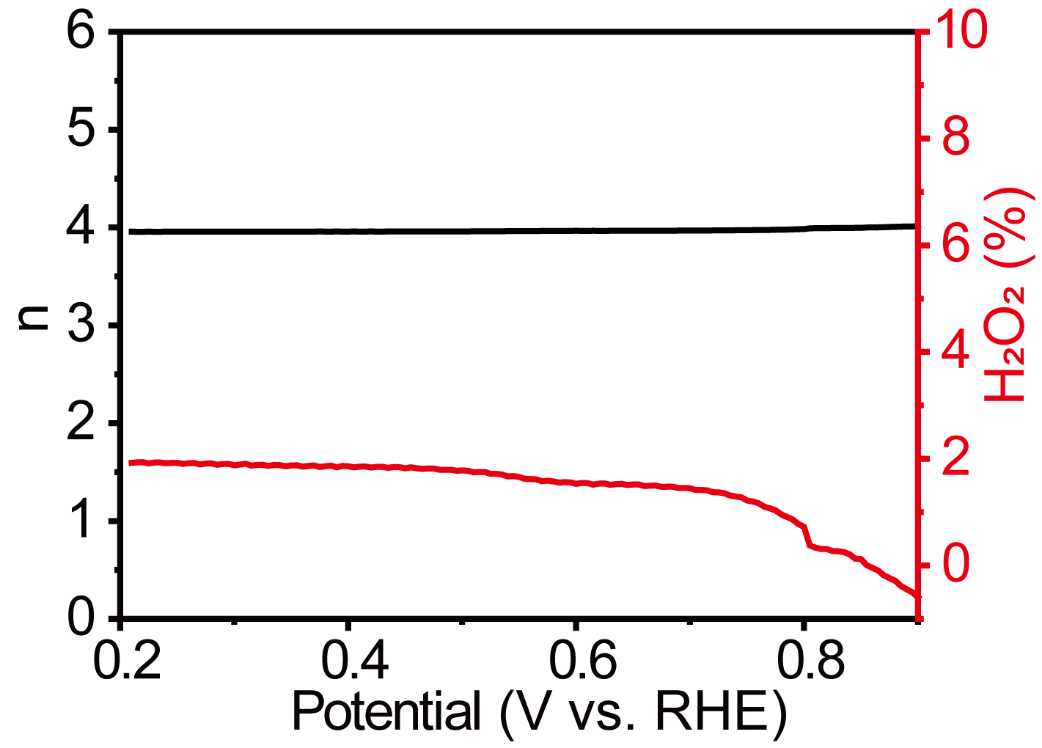


**Supplementary Fig. S22**. Electron transfer number (n) and H2O2 yield of Ru–Cl–N SAC derived from the RRDE measurement.


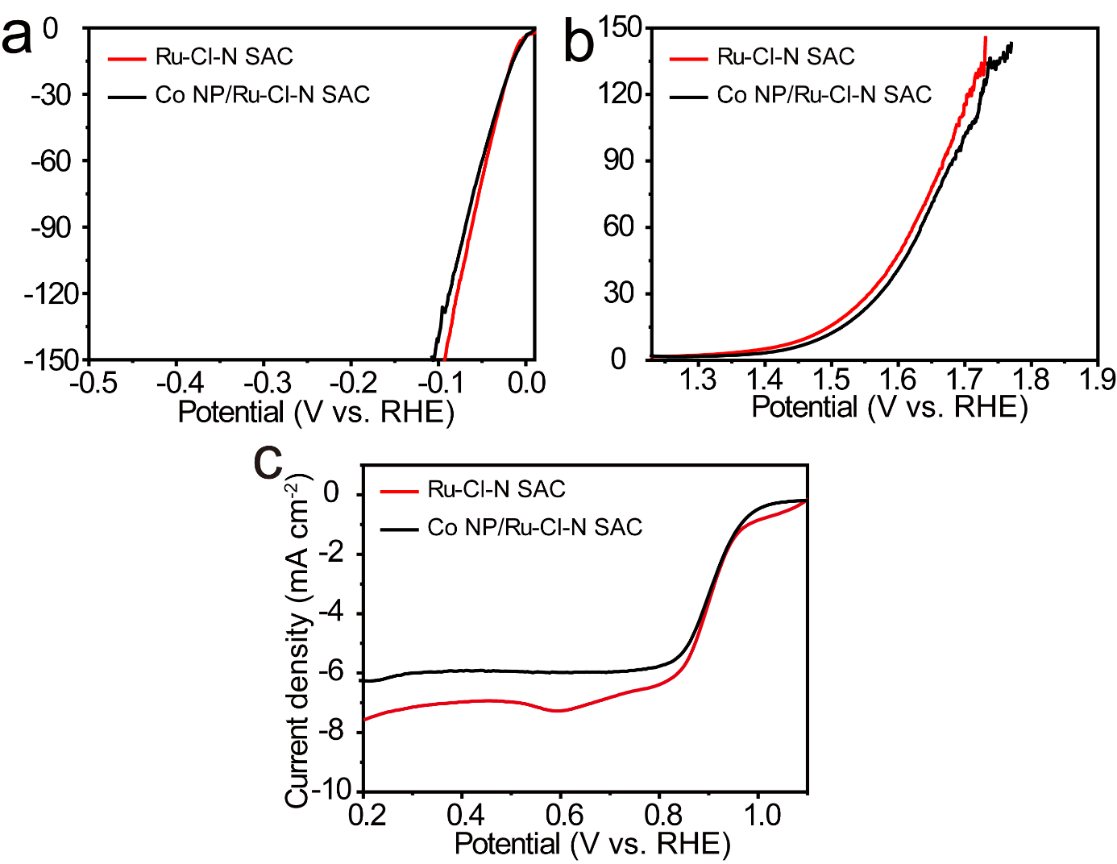


**Supplementary Fig. S23**. Polarization curves of Ru–Cl–N SAC (red) and Co NP/Ru–Cl–N SAC (black) in the process of (a) HER, (b) OER and (c) ORR.


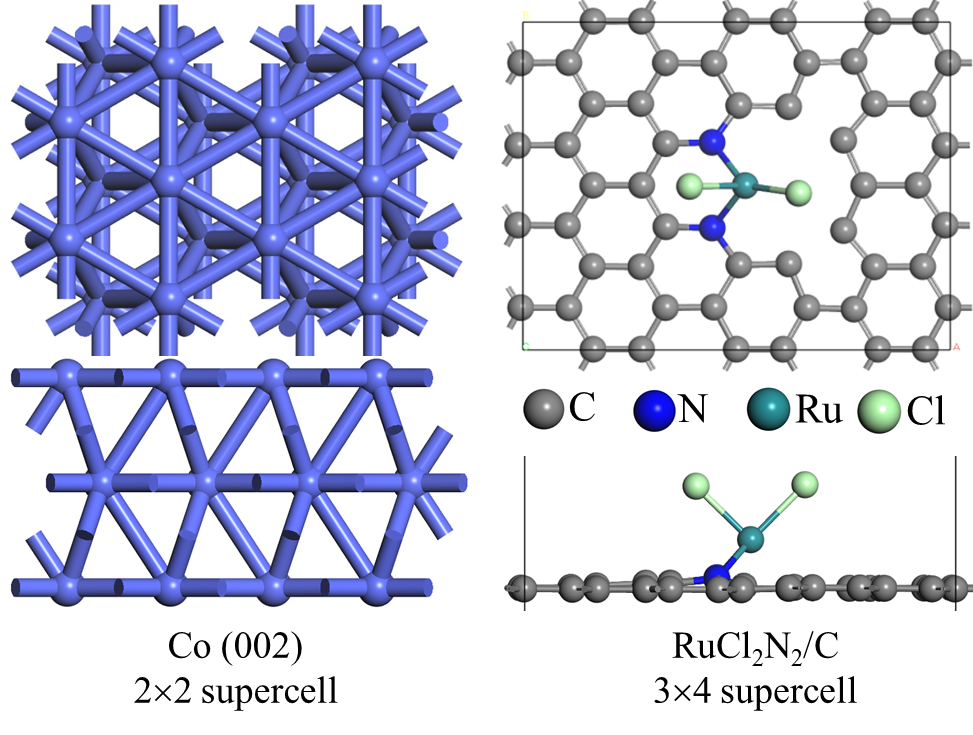


**Supplementary Fig. S24**. The structures of Co (002) 2×2 supercell.


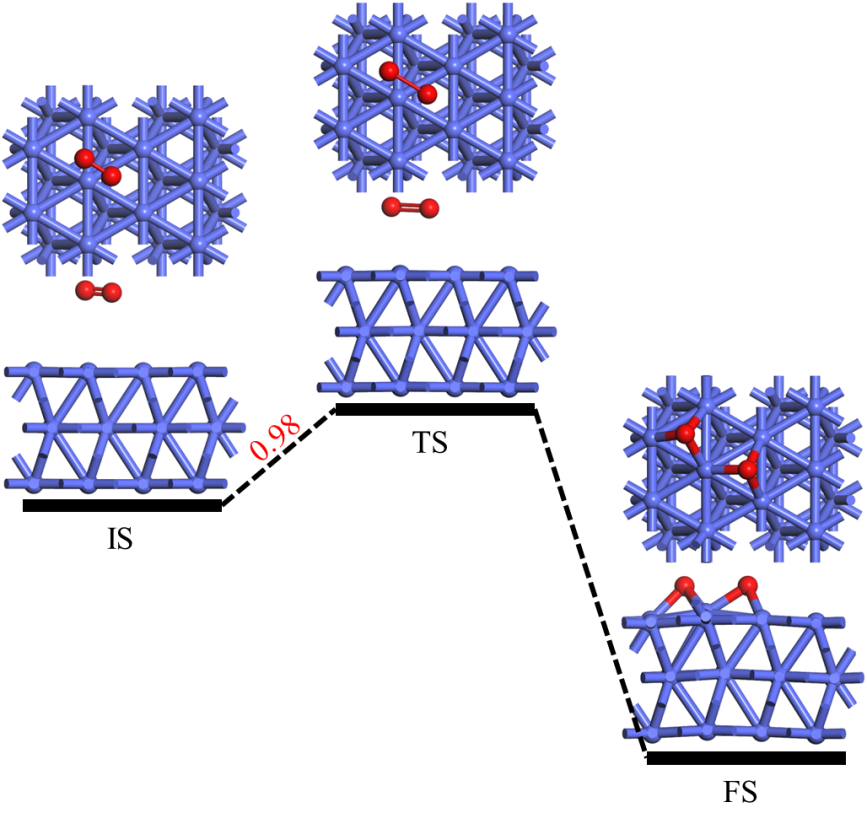


**Supplementary Fig. S25**. The dissociation process of O2 molecule on Co (002).

To further verify our experimental results, we performed DFT calculations to compare catalytic activities on Co (002) for comparison relative to RuCl2N2/C. First, the optimal adsorption site of the oxidation intermediate was tested on the Co (002). We found that the O=O bond in the Co (002) system is prone to break to form two O atoms. As shown in **Supplementary Fig. S25**, when a gaseous O2 molecule approaches Co (002), only the activation barrier of 0.98 eV needs to be overcome to cause the O=O bond to break and form two O atoms. Because of this, it becomes very difficult to generate O2 molecules on the Co (002) system. The adsorption free energies of oxygen-containing species uncover the origin of catalytic activities.


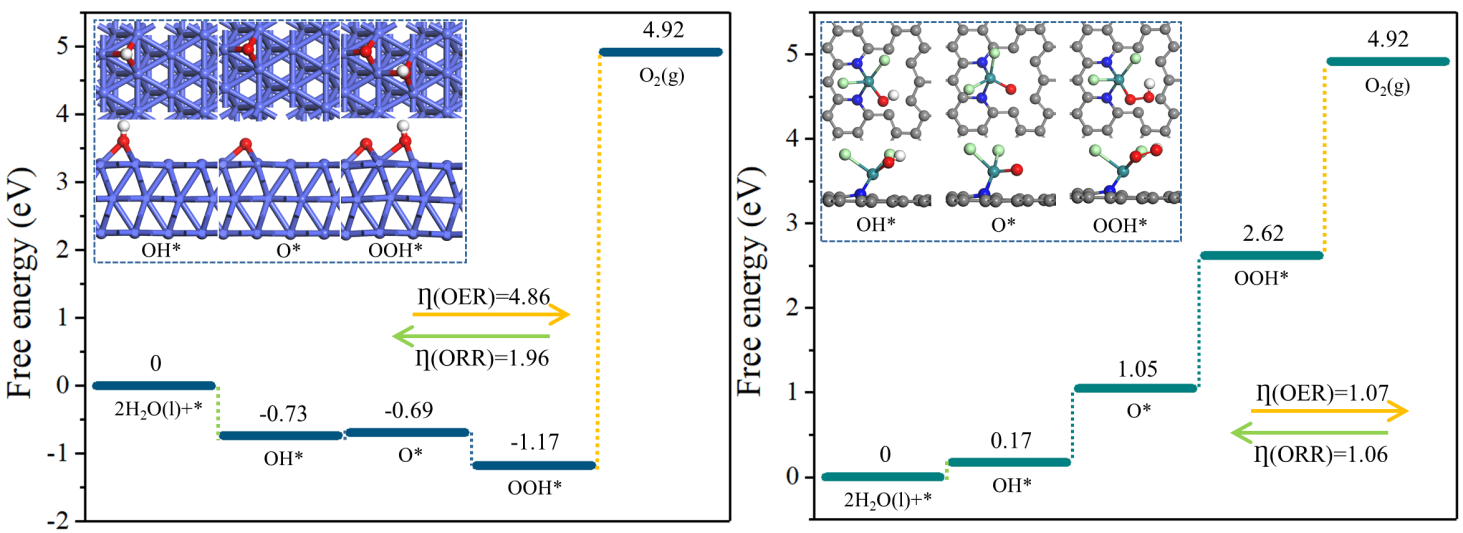


**Supplementary Fig. S26**. The free energy diagrams of OER and ORR on Co (002) at U = 0 V.

The OER and ORR catalytic performance on Co (002) was evaluated by the change in free energies of each reaction step (**Supplementary Fig. S26**). The results show that OER is indeed more difficult due to the larger overpotential (4.86 eV) on Co (002), while the ORR process only requires an overpotential of 1.96 eV. In contrast, the overpotentials of OER and ORR are both reduced on RuCl2N2/C. Moreover, the overpotentials of OER and ORR are basically the same (1.07 eV vs. 1.06 eV) on RuCl2N2/C (**Fig. 4** in the main text), which indicates the potential of RuCl2N2/C as a dual-functional catalyst.


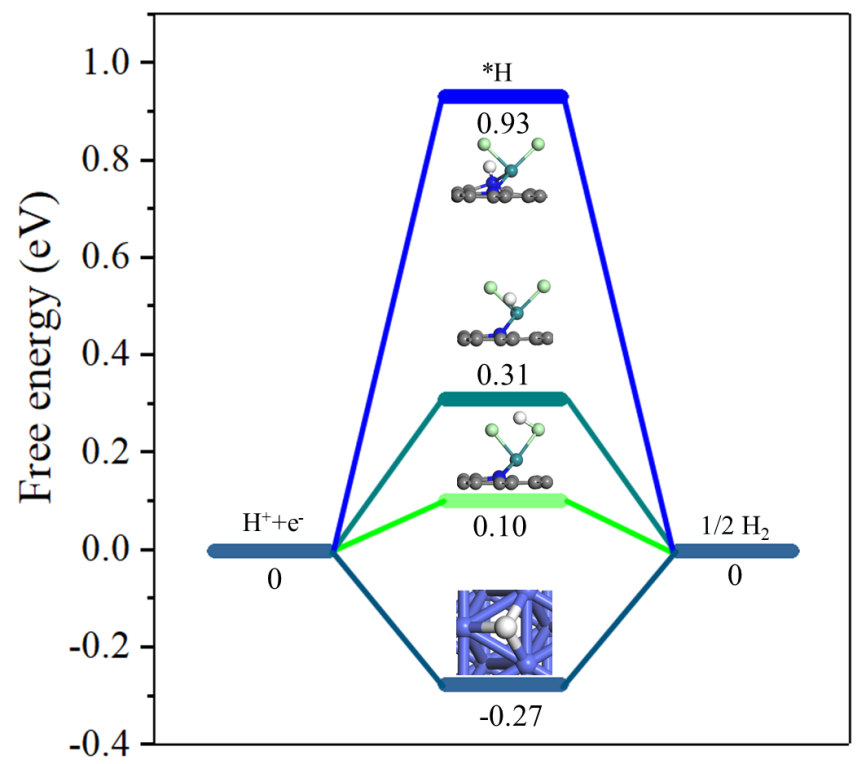


**Supplementary Fig. S27**. The free energy diagrams of HER on Co (002) and RuCl2N2/C at different sites.

The HER on Co (002) and RuCl2N2/C at different sites as shown in **Supplementary Fig. S27**. The most stable free energy of H adsorption is -0.27 eV on Co (002) and 0.10 eV on RuCl2N2/C, respectively.


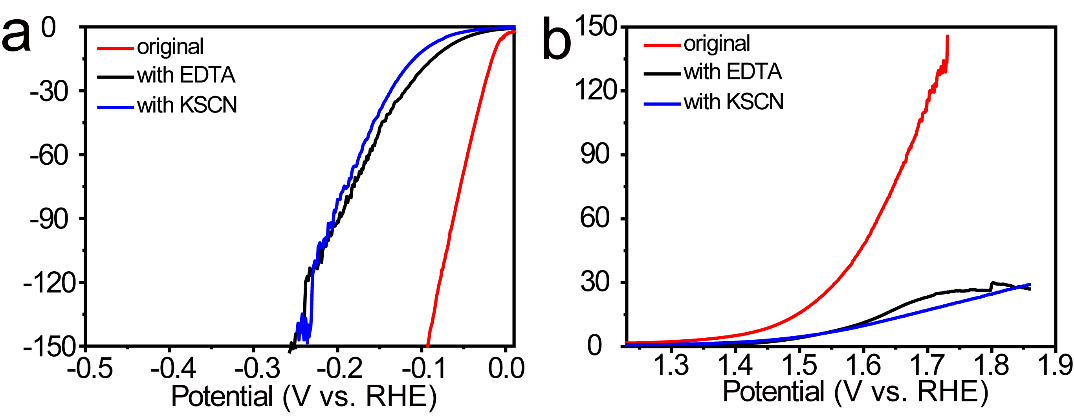


**Supplementary Fig. S28**. (a) HER and (b) OER polarization curves of the original Ru–Cl–N SAC (red), and after addition of EDTA (black) and KSCN (blue).


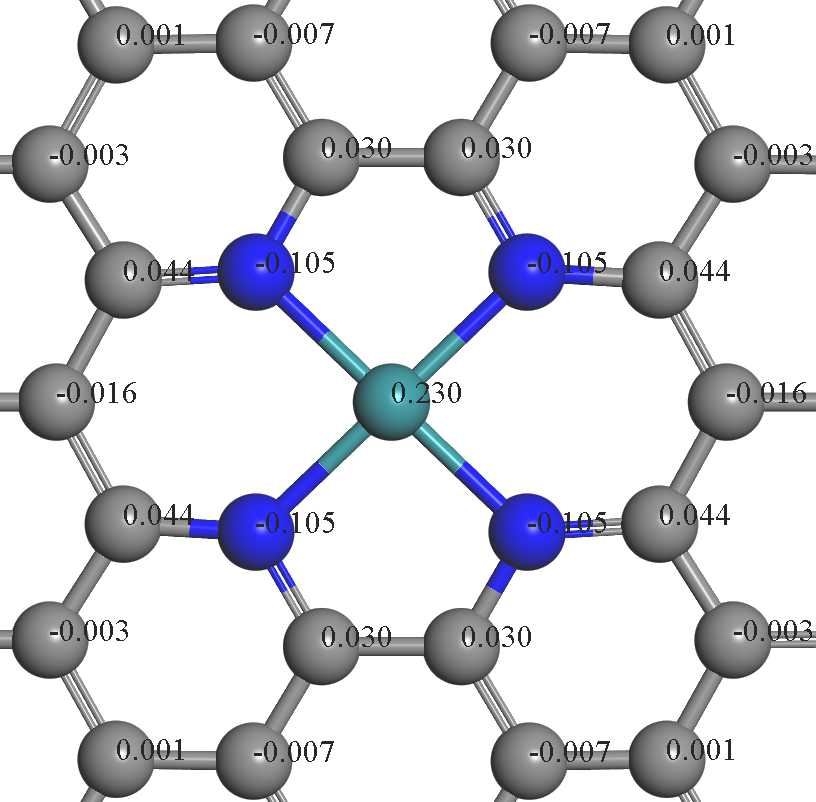


**Supplementary Fig. S29**. Charge partitioning of RuN4 SAC obtained by Hirshfeld method. Color code: C gray, N blue, Ru cyan.


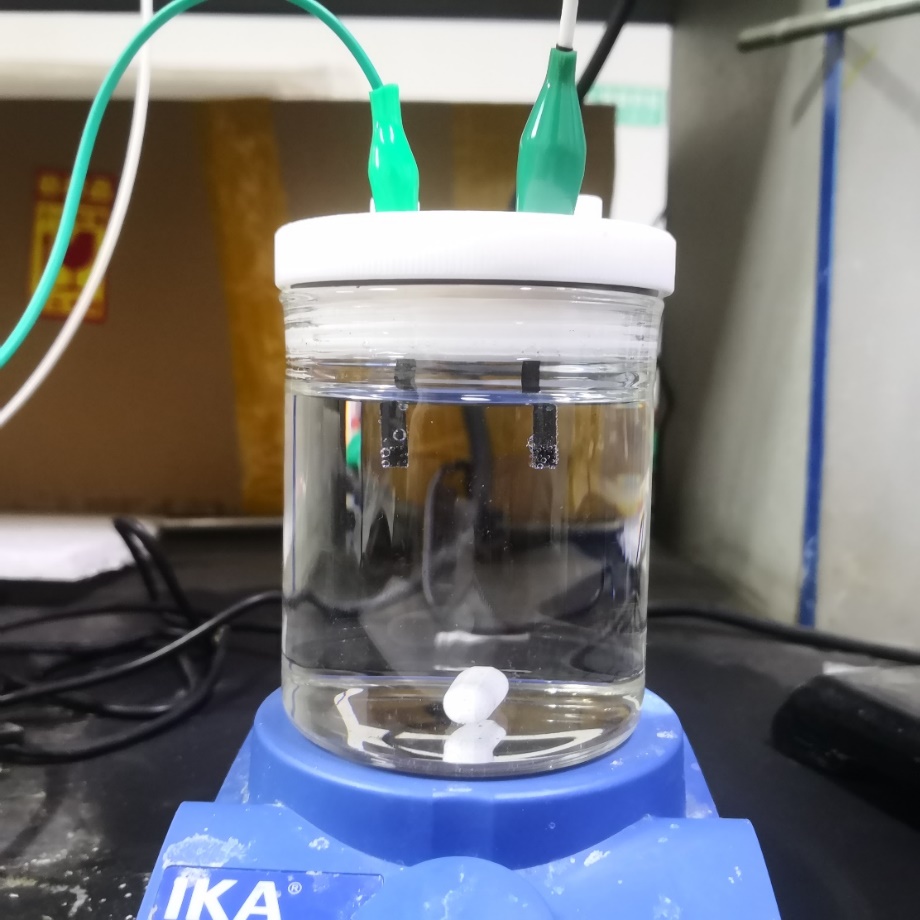


**Supplementary Fig. S30**. Optical image of the overall water splitting electrolyzer cell fabricated by Ru–Cl–N SAC.


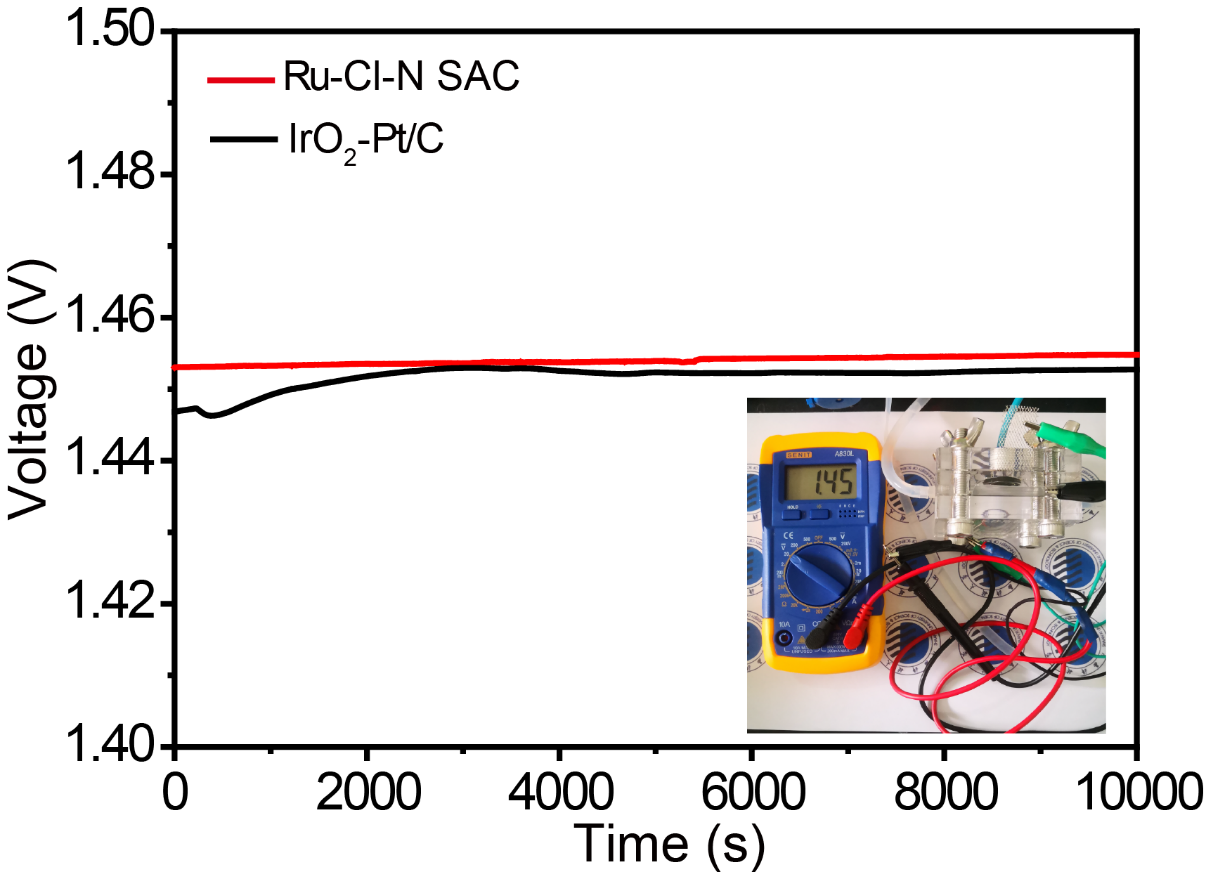


**Supplementary Fig. S31**. Open-circuit voltage (OCV) curves for the Zn-air batteries assembled by Ru–Cl–N SAC (red) and IrO2-Pt/C (black).

**Supplementary Table S1**. The fitting parameters for the FT EXAFS spectrum of Ru foil, RuO2, RuCl3, Ru–Cl–N SAC, RuN4 SAC and Ru NP/NC in R space.

| Sample | Shell | CNa | Rb  (Å) | σ2 c  (×10-3Å2) | ΔEd  (eV) | R factor |
| --- | --- | --- | --- | --- | --- | --- |
| Ru foil | Ru-Ru | 12 | 2.71 ± 0.01 | -- | -- | -- |
| RuO2 | Ru-O | 6 | 2.01 ± 0.01 | -- | -- | -- |
| RuCl3 | Ru-Cl | 6 | 2.35 ± 0.02 | -- | -- | -- |
| Ru–Cl–N SAC | Ru-N | 2.0 ± 0.02 | 2.06 ± 0.01 | 9.9 | 3.6 ± 2.0 | 0.59% |
| Ru-Cl | 2.6 ± 0.02 | 2.38 ± 0.02 | 3.0 | 15.3 ± 1.0 |
| Ru-Ru | 2.9 ± 0.02 | 2.65 ± 0.01 | 3.0 | -15 ± 1.3 |
| RuN4 SAC | Ru-N | 4.9 ± 0.6 | 2.10 ± 0.02 | 7.1 | 1.4 ± 3.0 | 1.85% |
| Ru NP/NC | Ru-Ru | 12 ± 0.3 | 2.66 ± 0.02 | 5.3 | -15.2 + 1.2 | 0.37% |

*a*CN: coordination numbers; *bR*: bond distance; *cσ*2: Debye-Waller factors; *d* Δ*E*0: the inner potential correction. *R* factor: goodness of fit. *Ѕ*02 was set to 0.82, according to the experimental EXAFS fit of Ru foil reference by fixing CN as the known crystallographic value; δ: percentage.

**Supplementary Table S2**. Comparison of turnover frequencies (TOFs) with some of recently reported HER catalysts in alkaline condition.

| No. | Catalyst | Overpotential  (V) | TOF per  active site  (H2 s−1) | reference |
| --- | --- | --- | --- | --- |
| 1 | Ru–Cl–N SAC | 0.025 | 0.66 | This work |
| 2 | Pt/C | 0.025 | 0.32 | This work |
| 3 | Ru@MWCNT | 0.025 | 0.4 | Nat. Commun. 2020, 11, 1278. |
| 4 | Ru@GnP | 0.1 | 0.145 | Adv. Mater. 2018, 30, 1803676. |
| 5 | Ru@C4N-900 | 0.025 | 0.65 | ACS Appl. Mater. Interfaces 2019, 11, 19176−19182. |
| 6 | Ru/C | 0.04 | 0.18 | Adv. Energy Mater. 2018, 8, 1801698. |
| 7 | 2.20 wt % Ru SAs–Ni2P | 0.125 | 1 | Nano Energy.2021, 80, 105467. |
| 8 | Ru-NBC-2 | 0.1 | 0.83 | Appl. Catal. B-Environ. 2021, 285.119795. |
| 9 | Ru-MoS2/CC | 0.169 | 0.2 | Appl. Catal. B-Environ. 2019, 249, 91-97. |
| 10 | Ru/NG-750 | 0.1 | 0.35 | ACS Appl. Mater. Interfaces 2017, 9, 3785-3791. |
| 11 | Ru/MeOH/THF | 0.1 | 0.87 | Chem. Commun. 2017, 53, 11713. |
| 12 | RuSA+NP/DC | 0.03 | 0.17 | Adv. Sci. 2021, 8, 2004516. |

**Supplementary Table S3**. The HER properties of Ru–Cl–N SAC compared with other recently-reported Ru-based HER electrocatalysts in 1 M KOH.

| No. | Catalyst | η10 (mV) | Tafel slope  (mV dec-1) | reference |
| --- | --- | --- | --- | --- |
| 1 | Ru–Cl–N SAC | 12 | 23.9 | This work |
| 2 | Ru-NC-700 | 47 | 14 | Nat. Commun. 2019, 10, 631. |
| 3 | Ru0.10@2H-MoS2 | 51 | 64.9 | Appl. Catal. B-Environ.  2021, 298, 120490 |
| 4 | Ru/Co3O4 NWs | 30.98 | 69.75 | Nano Energy 2021, 85,105940. |
| 5 | Ru/Co4N-CoF2 | 53 | 144.1 | Chem. Eng. J. 2021, 414, 128865. |
| 6 | CoRu0.5/CQDs | 18 | 38.5 | Angew. Chem. Int. Ed. 2021, 60, 3290-3298. |
| 7 | Ru/Co@OG | 13 | 22.8 | Angew. Chem. Int. Ed. 2021, 60, 2-9. |
| 8 | Ru@WNO-C | 24 | 39.7 | Nano Energy 2021, 80, 105531. |
| 9 | Ru@Co/N-CNTs-2 | 48 | 45 | ACS Sustainable Chem. Eng. 2020, 8, 24, 9136-9144. |
| 10 | Ru NCs/BNG | 14 | 28.9 | Nano Energy 2020, 68, 104301. |
| 11 | Pd–Ru@NG | 28 | 73 | Chem. Commun. 2019, 55, 13928. |
| 12 | Ru/C-H2O/CH3CH2OH | 53 | 36.2 | Appl. Catal. B-Environ. 2019, 258, 117952. |
| 13 | Ru/NC-0.01 | 17 | 32 | J. Mater. Chem. A 2019, 7, 18072-18080. |
| 14 | SA-Ru-MoS2 | 76 | 21 | Small Methods 2019, 1900653. |
| 15 | SA-Ru/Ru NPs/PC | 33 | 31.8 | J. Mater. Chem. A, 2019,7, 19531-19538 |
| 16 | Ru/CoO | 55 | 70 | J. Energy Chem. 2019, 37, 143-147. |
| 17 | Ru@NG | 20.3 | 26 | J. Mater. Chem. A, 2018, 6, 13859-13866. |

**Supplementary Table S4**. Comparison of turnover frequencies (TOFs) with some of recently reported OER catalysts in alkaline condition.

| No. | Catalyst | Overpotential  (V) | TOF per  active site  (H2 s−1) | reference |
| --- | --- | --- | --- | --- |
| 1 | Ru–Cl–N SAC | 0.3 | 0.271 | This work |
| 2 | CoNi hydroxide UNSs | 0.38 | 0.16 | Nano Res. 2016, 9, 1856–1865. |
| 3 | Ni3S2 | 0.35 | 0.021 | Chem. Eng. J. 2021, 411, 128488. |
| 4 | Vo-CoOOH | 0.3 | 0.04 | Nano Energy 2017, 42, 98-105. |
| 5 | P─Ni0.75Fe0.25Se2 | 0.5 | 0.18 | Adv. Sci. 2021, 2101775 |
| 6 | Ni0.5Fe0.5@COF-SO3 | 0.3 | 0.14 | Inorg. Chem. 2020, 59, 4995−5003. |
| 7 | Ni1.5Fe0.5P/CF  nanosheet | 0.3 | 0.014 | Nano Energy, 2017, 34, 472. |
| 8 | CoNiP ultrathin nanosheet | 0.3 | 0.028 | Energy Environ. Sci., 2017, 10, 893. |
| 9 | CoFe2O4/C | 0.3 | 0.0915 | Adv. Mater. 2017, 29, 1604437 |
| 10 | 3DIO-LaCoO3-x | 0.5 | 0.21 | J. Power Sources 2020, 478, 228748 |
| 11 | NiCoP/GO nanoparticle | 0.3 | 0.047 | Adv. Funct. Mater., 2016, 26, 6785 |
| 12 | NiCo-UMOFNs nanosheet | 0.3 | 0.18 | Nat. Energy, 2016, 1, 16184. |

**Supplementary Table S5**. The OER properties of Ru–Cl–N SAC compared with other recently-reported Ru-based OER electrocatalysts in 1 M KOH.

| No. | Catalyst | η10 (mV) | reference |
| --- | --- | --- | --- |
| 1 | CoRu/NC | 233 | This work |
| 2 | Co3O4-Ru1 | 249 | Nano Today 2020, 34, 100955. |
| 3 | (Ru-Co)Ox-350 | 265 | Chem. Eng. J. 2021, 420, 129805. |
| 4 | LFRO-H-O | 380 | Chem. Eng. J. 2021, 418, 129422. |
| 5 | Ca2FeRuO6 | 400 | ACS Appl. Energy Mater. 2021, 4, 1323-1334. |
| 6 | Ru-0.3 | 280 | Appl. Surf. Sci. 2021, 544, 148897. |
| 7 | Ru-CoMo/CFP | 237 | Appl. Surf. Sci. 2021, 541, 148518. |
| 8 | NP-Ru3 | 245 | J. Mater. Sci. Tech. 2021, 70, 197-204. |
| 9 | RuTe2-400 | 275 | Appl. Catal. B-Environ. 2020, 278, 119281. |
| 10 | Ru-CoNi@NC-2 | 240 | ACS Sustainable Chem. Eng. 2019, 7, 17227-17236. |
| 11 | Ru-N-C | 267 | Nat. Commun. 2019, 10, 4849. |
| 12 | CoRu-O/A@HNC-2 | 253* | ACS Appl. Mater. Interfaces 2020, 12, 51437-51447. |
| 13 | 5.0V-LRO | 330* | Energy Environ. Sci. 2020, 13, 2167. |

* data measured in 0.1 M KOH solution.

**Supplementary Table S6**. The ORR properties of Ru–Cl–N SAC compared with other recently-reported Ru-based ORR electrocatalysts in 0.1 M KOH.

| No. | Catalyst | E1/2  (V vs. RHE) | reference |
| --- | --- | --- | --- |
| 1 | Ru–Cl–N SAC | 0.90 | This work |
| 2 | Ca2FeRuO6 | 0.78* | ACS Appl. Energy Mater. 2021, 4, 1323-1334. |
| 3 | a-Ru@Co/CN | 0.908* | Mater. Today Phys. 2021, 17, 100338. |
| 4 | CoRu-O/A@HNC-2 | 0.821 | ACS Appl. Mater. Interfaces 2020, 12, 51437-51447. |
| 5 | Ru0.5/HNCS | 0.72 | Mater. Today Phys. 2021, 16, 100300. |
| 6 | Ru0.95Co0.05/C | 0.839 | ACS Catal. 2020, 10, 4608-4616. |
| 7 | Ru/MWCNT | 0.72 | Nanoscale 2019, 11, 13968. |
| 8 | Ru-SSC | 0.824 | J. Am. Chem. Soc. 2019, 141, 19800-19806. |
| 9 | Pd–Ru@NG | 0.80 | Chem. Commun. 2019, 55, 13928. |
| 10 | Pb2Ru2O6.5 | ~0.82 | Energy Environ. Sci. 2017, 10, 129. |

* data measured in 1 M KOH solution.

**Supplementary Table S7**. The HER (1 M KOH), OER (1 M KOH) and ORR (0.1 M KOH) properties of Ru–Cl–N SAC compared with other recently-reported trifunctional electrocatalysts.

| No. | Catalyst | HER η10 (mV) | OER η10 (mV) | E1/2  (V vs. RHE) | reference |
| --- | --- | --- | --- | --- | --- |
| 1 | Ru–Cl–N SAC | 12 | 233 | 0.90 | This work |
| 2 | Pt@CoS2-NrGO | 390 | 235 | 0.85 | Appl. Catal. B-Environ. 2021, 297, 120405. |
| 3 | FeCo-P-2 | 183 | 277 | 0.83 | Appl. Catal. B-Environ. 2021, 295, 120275. |
| 4 | P,S-CoxOy/Cu@CuS | 116 | 280 | 0.67 | Adv. Funct. Mater. 2020, 2007822. |
| 5 | Co2P/CoNPC | 208 | 326 | 0.843 | Adv. Mater. 2020, 2003649. |
| 6 | Mo2C/Co@NC | 510 | 308 | 0.86 | Appl. Catal. B-Environ. 2021, 296, 120360. |
| 7 | Ni@N-HCGHF | 950 | 260 | 0.875 | Adv. Mater. 2020, 2003313. |
| 8 | ZnCo−PVP-900−acid | 270 | 420 | 0.84 | ACS Appl. Mater. Interfaces 2019, 11, 9925-9933. |
| 9 | NiS2 | 147 | 241 | 0.8 | J. Mater. Chem. A, 2019, 7, 23787-23793. |
| 10 | Co@N-CNTF-2 | 220 | 350 | 0.81 | J. Mater. Chem. A, 2019, 7, 3664-3672. |
| 11 | FeNiP/NCH | 216 | 250 | 0.75 | J. Am. Chem. Soc. 2019, 141, 7906-7916. |
| 12 | CoP | 62.5 | 330 | 0.858 | Adv. Mater. 2018, 1705796. |
| 13 | FePx/Fe–N–C/NPC | 75 | 325 | 0.86 | Adv. Energy Mater. 2018, 1803312. |
| 14 | NCNT/CoFe-CoFe2O4 | 204 | 310 | 0.72 | ACS Appl. Mater. Interfaces 2018, 10, 46, 39828-39838. |
| 15 | Co3O4/NCMTs | 210 | 350 | 0.778 | J. Mater. Chem. A 2017, 5, 20170-20179. |
| 16 | NSCHCT1000 | 360 | 460* | 0.84 | Chem. Eng. J. 2021, 418, 129321. |
| 17 | Co-NCNT-600 | 235* | 397* | 0.81 | J. Colloid Interface Sci. 2021, 585, 276-286. |
| 18 | Co4N@NC-2 | 283 | 290* | 0.84 | Appl. Catal. B-Environ. 2020, 275, 119104. |
| 19 | FeCo/Co2P@NPCF | 260 | 330* | 0.79 | Adv. Energy Mater. 2020, 1903854. |

* data measured in 0.1 M KOH solution.

**Supplementary Table S8**. The overall water splitting properties of Ru–Cl–N SAC compared with other recently-reported overall water splitting catalysts measured in 1 M KOH.

| Catalysts | η10 (mV) | | E (V)  @10 mA cm-2 | References |
| --- | --- | --- | --- | --- |
| HER | OER |
| Ru–Cl–N SAC | 12 | 233 | 1.49 | This work |
| Ru1/D-NiFe LDH | 18 | 189 | 1.44 | Nat. Commun. 2021, 12, 4587. |
| RuIrOx | 13 | 250 | 1.47 | Nat. Commun. 2019, 10, 4875. |
| Ru/N-BP2000 | 15 | 285 | 1.53 | ChemCatChem2019, 11, 4327–4333. |
| CoP NFs | 136 | 323 | 1.65 | ACS Catal. 2020, 10, 1, 412-419. |
| Ce-NiFe-LDH | 147 | 175 | 1.59 | Sustain. Energ. Fuels, 2020, 4, 312-323 |
| CoMoNiS-NF | 113 | 117 | 1.54 | J. Am. Chem. Soc. 2019, 141, 10417. |
| RuCu NSs | 20 | 234 | 1.49 | Angew. Chem. Int. Ed. 2019, 58, 13983. |
| Ni2P@NSG | 110 | 240 | 1.572 | Chem. Mater. 2021, 33, 1, 234–245 |
| Co2P/CoNPC | 130 | 326 | 1.64 | Adv. Mater., 2020, 32, 2003649. |
| Ni/Ni(OH)2 | 77 | 270 | 1.59 | Adv. Mater. 2020, 32, 1906915. |
| Co@N-CS/N-HCP | 66 | 248 | 1.545 | Adv. Energy Mater.2019, 9, 1803918. |
| Co–Fe oxyphosphide MTs | 180 | 280 | 1.69 | Adv. Sci., 2019, 6, 1900576. |
| Co0.6Fe0.4P-1.125 | 133 | 298 | 1.57 | Chem. Sci., 2019, 10, 464-474. |
| Co1–Fe1–B–P nanochains | 173 | 225 | 1.68 | Nanoscale, 2019, 11, 7506-7512. |
| CVN/CC | 118 | 263 | 1.64 | Appl. Catal. B-Environ., 2019, 241, 521-527. |
| CoP@NPCSs | 115 | 350 | 1.643 | ACS Appl. Mater. Interfaces, 2018, 10, 44201-44208. |
| CoP/NCNHP | 115 | 310 | 1.64 | J. Am. Chem. Soc., 2018, 140, 7, 2610-2618. |
| CoSe2/MoSe2 | 90 | 280 | 1.67 | Energy Environ. Sci., 2016, 9, 478. |
| Ni3S2/NF | 223 | 260 | 1.76 | J. Am. Chem. Soc., 2015, 137, 14023. |
| NiFe LDH/NF | 210 | 240 | 1.7 | Science, 2014, 345, 1593-1596. |
| CP/CNTs/Co-S | 190 | 307 | 1.743 | ACS Nano, 2016, 10, 2342. |
| NiSe/NF | 96 | 270 (η20) | 1.63 | Angew. Chem. Int. Ed. 2015, 54, 9351-9355 |
| Co3O4 nanocrystals | 380 | 320 | 1.91 | Chem. Commun., 2015, 51, 8066. |
| Co-NC/CNT | 203 | 354 | 1.625 | J. Mater. Chem. A, 2016, 4, 16057-16063. |
| NiCo2S4 NS/CC | 181 | 240 | 1.66 | ACS Sustainable Chem. Eng., 2018, 6, 5011-5020. |
| Fe11.1%-Ni3S2/Ni foam | 126 | 234 (η50) | 1.60 | J. Mater. Chem. A, 2018,6, 4346-4353. |

**Supplementary Table S9**. The Zn-air battery properties fabricated by Ru–Cl–N SAC compared with other recently-reported catalysts.

| Catalysts | OCV  (V) | Power density  (mW cm-2) | Specific capacity  (mAh g-1) | References |
| --- | --- | --- | --- | --- |
| Ru–Cl–N SAC | 1.455 | 205 | 804.26 | This work |
| Pb2Ru2O6.5 | ~1.25 | 195 | N.A. | Energy Environ. Sci. 2017, 10, 129. |
| Pt@CoS2-NrGO | 1.41 | 114 | 763 | Appl. Catal. B-Environ. 2021, 297, 120405. |
| FeCo-P-2 | 1.415 | 205 | 800 | Appl. Catal. B-Environ. 2021, 295, 120275. |
| P,S-CoxOy/Cu@CuS | 1.383 | 130 | N.A. | Adv. Funct. Mater. 2020, 2007822. |
| Co2P/CoNPC | 1.425 | 116 | N.A. | Adv. Mater. 2020, 2003649. |
| Mo2C/Co@NC | 1.41 | 187.9 | 691 | Appl. Catal. B-Environ. 2021, 296, 120360. |
| Ni@N-HCGHF | 1.49 | 117.1 | 706 | Adv. Mater. 2020, 2003313. |
| CoFe/N-GCT | 1.43 | 203 | N.A. | Angew. Chem. Int. Ed. 2018, 57, 16166-16170. |
| NGM-Co | 1.439 | 152 | 749.4 | Adv. Mater. 2017, 1703185. |
| Co@N-CNTF-2 | N.A. | 91 | N.A. | J. Mater. Chem. A, 2019, 7, 3664-3672. |
| FeNiP/NCH | 1.48 | 250 | N.A. | J. Am. Chem. Soc. 2019, 141, 7906-7916. |
| NPMC-1000 | 1.48 | 55 | 735 | Nat. Nanotech. 2015, 10, 444-452. |
| FePx/Fe–N–C/NPC | 1.25 | N.A. | 739 | Adv. Energy Mater. 2018, 1803312. |
| NCNT/CoFe-CoFe2O4 | 1.56 | 98 | 606 | ACS Appl. Mater. Interfaces 2018, 10, 46, 39828-39838. |
| N-GRW | 1.46 | 65 | 873 | Sci. Adv. 2016, 2, e1501122. |
| NSCHCT1000 | 1.44 | 109 | N.A. | Chem. Eng. J. 2021, 418, 129321. |
| NDGs-800 | 1.45 | 115.2 | 750.8 | ACS Energy Lett. 2018, 3, 1183-1191. |
| Co4N@NC-2 | 1.48 | 74.3 | 769.4 | Appl. Catal. B-Environ. 2020, 275, 119104. |
| FeCo/Co2P@NPCF | 1.44 | 154 | N.A. | Adv. Energy Mater. 2020, 1903854. |

N.A. refers to “not available”.

# References

1. Wei C*, et al.* Recommended practices and benchmark activity for hydrogen and oxygen electrocatalysis in water splitting and fuel cells. *Adv. Mater.* **31**, 1806296 (2019).

2. Pan Y*, et al.* Core–shell ZIF-8@ZIF-67-derived CoP nanoparticle-embedded N-doped carbon nanotube hollow polyhedron for efficient overall water splitting. *J. Am. Chem. Soc.* **140**, 2610-2618 (2018).

3. Zhao L*, et al.* Cascade anchoring strategy for general mass production of high-loading single-atomic metal-nitrogen catalysts. *Nat. Commun.* **10**, 1278 (2019).

4. Lu B*, et al.* Ruthenium atomically dispersed in carbon outperforms platinum toward hydrogen evolution in alkaline media. *Nat. Commun.* **10**, 631 (2019).

5. Yan L*, et al.* A Freestanding 3D heterostructure film stitched by MOF-derived carbon nanotube microsphere superstructure and reduced graphene oxide sheets: a superior multifunctional electrode for overall water splitting and Zn–air batteries. *Adv. Mater.* **32**, 2003313 (2020).

6. Delley B. From molecules to solids with the DMol3 approach. *J. Chem. Phys.* **113**, 7756-7764 (2000).

7. Grimme S. Semiempirical GGA-type density functional constructed with a long-range dispersion correction. *J. Comp. Chem.* **27**, 1787-1799 (2006).

8. Ernzerhof M, Scuseria GE. Assessment of the Perdew–Burke–Ernzerhof exchange-correlation functional. *J. Chem. Phys.* **110**, 5029-5036 (1999).

9. Tkatchenko A, Scheffler M. Accurate molecular Van Der Waals interactions from ground-state electron density and free-atom reference data. *Phys. Rev. Lett.* **102**, 073005 (2009).

10. Hu X. et al. Ru single atoms on N-doped carbon by spatial confinement and ionic substitution strategies for high-performance Li–O2 batteries. *J. Am. Chem. Soc.* **142**, 16776-16786 (2020).

11. Feng Y. et al. Decorating CoNi layered double hydroxides nanosheet arrays with fullerene quantum dot anchored on Ni foam for efficient electrocatalytic water splitting and urea electrolysis. *Chem. Eng. J.* **390**, 124525 (2020).

12. Kweon D. H. et al. Ruthenium anchored on carbon nanotube electrocatalyst for hydrogen production with enhanced Faradaic efficiency. *Nat. Commun.* **11**, 1278 (2020).

13. Mahmood J. et al. An efficient and pH-universal ruthenium-based catalyst for the hydrogen evolution reaction. *Nat. Nanotech.* **12**, 441-446 (2017).
